*COVID: mental health and physical activity*

1 Running header: *COVID: mental health and physical activity*

2

3 A Mental Health Paradox: Mental health was both a motivator and barrier to physical activity  
4 during the COVID-19 pandemic

5

6

7

8 Maryam Marashi<sup>1¶</sup>, Emma Nicholson<sup>1¶</sup>, Michelle Ogrodnik<sup>1&</sup>, Barbara Fenesi<sup>2&</sup>, and Jennifer  
9 Heisz<sup>1\*</sup>

10

11 <sup>1</sup>McMaster University, 1280 Main Street West, Hamilton, Ontario, Canada. L8S 4L8

12 <sup>2</sup>Western University, 1151 Richmond Street, London, Ontario, Canada. N6A 3K7

13

14

15 \*Corresponding author

16 [heiszjj@mcmaster.ca](mailto:heiszjj@mcmaster.ca)

17

18 <sup>¶</sup>These authors contributed equally to this work.

19

20 <sup>&</sup>These authors also contributed equally to this work.

21

22

23

24

25

26 Number of pages: 18

27 Number of figures: 8

28 Number of tables: 3

29 Number of words: Abstract (259); Main text (3,959)

30 Declarations of interest: none

## COVID: mental health and physical activity

### 31 **Abstract**

32  
33 The COVID-19 pandemic has impacted the mental health, physical activity, and sedentary  
34 behavior of citizens worldwide. Using an online survey with 1669 respondents, we sought to  
35 understand why and how by querying about perceived barriers and motivators to physical  
36 activity that changed because of the pandemic, and how those changes impacted mental  
37 health. Consistent with prior reports, our respondents were less physically active (aerobic  
38 activity, -11%,  $p < 0.05$ ; strength-based activity, -30%,  $p < 0.01$ ) and more sedentary (+11%,  
39  $p < 0.01$ ) during the pandemic as compared to 6-months before. The pandemic also increased  
40 psychological stress (+22%,  $p < 0.01$ ) and brought on moderate symptoms of anxiety and  
41 depression. Respondents' whose mental health deteriorated the most were also the ones who  
42 were least active (depression  $r = -.21$ ,  $p < 0.01$ ; anxiety  $r = -.12$ ,  $p < 0.01$ ). The majority of  
43 respondents were unmotivated to exercise because they were too anxious (+8%,  $p < 0.01$ ),  
44 lacked social support (+6%,  $p = < 0.01$ ), or had limited access to equipment (+23%,  $p < 0.01$ ) or  
45 space (+41%,  $p < 0.01$ ). The respondents who were able to stay active reported feeling less  
46 motivated by physical health outcomes such as weight loss (-7%,  $p < 0.01$ ) or strength (-14%,  
47  $p < 0.01$ ) and instead more motivated by mental health outcomes such as anxiety relief (+14%,  
48  $p < 0.01$ ). Coupled with previous work demonstrating a direct relationship between mental  
49 health and physical activity, these results highlight the potential protective effect of physical  
50 activity on mental health and point to the need for psychological support to overcome  
51 perceived barriers so that people can continue to be physically active during stressful times  
52 like the pandemic.

### 53 **Introduction**

54  
55 During the initial phase of the COVID-19 pandemic, governing bodies worldwide took  
56 decisive action to protect their citizens against the novel coronavirus by enforcing public  
57 lockdown and closing all non-essential services [1]. Although such measures helped to  
58 “flatten the curve” and minimize infection rates, the restrictions also had unforeseen  
59 consequences on citizens' health and well-being in that pandemic-related concerns amplified  
60 mental distress of citizens worldwide [2-8]. A major concern is that psychological distress can  
61 quickly deteriorate into mental illness, even for people without a prior diagnosis [9]; though  
62 susceptibility varies by age [10] and income [11], with younger and low income being more  
63 susceptible. This has created an urgent need for effective interventions to help minimize the  
64 psychological burden of the pandemic and prevent a mental health crisis [12].

65 One of the most effective interventions to prevent stress-induced mental illness is  
66 physical activity. People who are more active also tend to be less anxious and depressed  
67 [13], and sedentary people who engage in a new exercise program experience relief from  
68 their depressive symptoms [14]. Compared to antidepressant medication, thirty minutes of  
69 *moderate-intensity* aerobic exercise three times weekly may be equally effective at reducing

## *COVID: mental health and physical activity*

70 psychological distress and decreasing symptoms of depression and anxiety without any of the  
71 drug-related side effects such as nausea, fatigue, or loss of appetite [15].

72 However, maintaining a regular exercise program is difficult at the best of times and  
73 the conditions surrounding the COVID-19 pandemic may be making it even more difficult. The  
74 World Health Organization (WHO) recommends adults participate in 150 min/week of  
75 moderate-intensity aerobic physical activity (or 75 min/week of vigorous-intensity aerobic  
76 physical activity) and 2 or more days per week of muscle-strengthening activities [16].  
77 Globally, about 1 in 4 people were not meeting these guidelines prior to the pandemic [16],  
78 with these numbers differing by age [17] and income [18] such that younger adults are more  
79 likely to meet guidelines than older adults and higher income predicts better adherence to the  
80 guidelines than lower income. Recent reports suggest the pandemic has further decreased  
81 physical activity and increased sedentary time [19]. In animal models, forced inactivity causes  
82 depressive symptoms [20], and experimentally controlled periods of exercise withdrawal in  
83 humans lead to increased symptoms of depression and anxiety [21]. This link between  
84 physical and mental health is being further exposed in humans during this pandemic. An  
85 online survey administered during the initial stage of the COVID-19 pandemic found that  
86 respondents who were less physically active had worse mental health [22]. Another survey  
87 conducted at the same time found that more screen time (a common sedentary behaviour)  
88 was associated with worse mental health in all respondents except for those who were  
89 physically active [23], suggesting that physical activity may protect against the expected  
90 mental health decline caused by the sedentary lifestyle of enforced lockdown.

91 What is it about the pandemic that is making people less active, and how can we best  
92 support those who are struggling to stay active? Using an online survey, the present study  
93 gathered information from 1669 respondents pertaining to their physical activity, sedentary  
94 behavior and mental health before and during the initial lockdown of COVID-19. We were  
95 primarily interested in investigating any shifts in perceived barriers and motivators to being  
96 physically active. Typically, the most common perceived barrier to being physically active is  
97 lack of time [24]. Lack of motivation is another commonly cited barrier [24]. However, given  
98 the unprecedented circumstances surrounding the COVID-19 pandemic, people may now  
99 face unique barriers and motivators to engaging in physical activity.

100

## 101 **Materials and methods**

### 102 **Design and respondents**

103

104 To achieve a small margin of error based on a population size of 37 million, we  
105 recruited a total of 1669 respondents over a two-month data collection period (April 23 to  
106 June 30, 2020), for a 2% margin of error with 95% confidence intervals. The survey was open  
107 to all respondents at least 18 years of age, fluent in English, and able to complete the online  
108 survey. Respondents were recruited through the personal social media accounts of the  
109 research team and through local news sources (news articles by media at McMaster

## *COVID: mental health and physical activity*

110 University and Hamilton Spectator). Respondents were also recruited via a link provided at  
111 the end of an op-ed piece published in The Conversation Canada, a national independent  
112 news source from the academic and research community.

113 The survey consisted of 30 questions and used a mix of multiple-choice, single choice,  
114 and short answer questions to query respondents about their demographic information, and  
115 their current and past (prior to the pandemic) physical activity behaviour (minutes/week).  
116 Additionally, respondents were asked about their current and past mental health status (i.e.,  
117 stress levels, anxiety and depressive symptoms). All questions pertaining to physical activity  
118 and mental health were designed using validated rating scales. Respondents were included in  
119 a draw for 20 cash prizes of \$100 CAN as remuneration for their participation in the form of an  
120 emailed prepaid voucher.

121

## 122 **Measurements**

### 123 **Physical activity**

124 The Physical Activity and Sedentary Behavior Questionnaire (PASB-Q) [25] was  
125 adapted (i.e., rewording of questions to include COVID-19) to quantify self-reported levels of  
126 physical activity and sedentary behaviour 6-months prior to and during the COVID-19  
127 pandemic. Respondents were asked to report minutes/week of strength training and aerobic  
128 exercise, hours/week of sedentary behavior, and self-rated activity level status on a 5-point  
129 scale where 1 = “Completely sedentary”, 2 = “Slightly active”, 3 = “Very active”, 4 =  
130 “Recreational athlete”, 5 = “Elite athlete”.

131

### 132 **Barriers and motivators to exercise**

133 Respondents were asked to report current and prior (i.e., 6 months prior to COVID-19)  
134 barriers preventing them from being physically active using a multiple-choice list (e.g., “I  
135 could/cannot find the time in my day”, “I did/do not have access to a gym or recreational  
136 facility”) and motivators encouraging them to be physically active (e.g., “To maintain a healthy  
137 body weight”, “To build muscle and/or strength”) (S1 Appendix).

138

### 139 **Mental health**

140 Anxiety was measured using an adapted (i.e., on a 5-point scale instead of a 3-point  
141 scale to match other questionnaires and ease participant burden) version of the Generalized  
142 Anxiety Disorder 7-item Scale (GAD-7) [26]. Respondents were asked how often they felt  
143 bothered by each anxiety symptom since the onset of COVID-19. Response options were 1 =  
144 “Not at all”, 2 = “Several days”, 3 = “More than half the days”, 4 = “Most days”, and 5 = “Every  
145 day”. All seven items were combined to form a global measure of anxiety.

146 Depression was measured using an adapted version of the Patient Health  
147 Questionnaire (PHQ-9) [27]; all but one of the 9 items (i.e., the one pertaining to suicidal  
148 thoughts and/or self-harm) were included for a total of 8 items, which were combined into a

## COVID: mental health and physical activity

149 global measure of depression. Respondents were asked how often they feel bothered by  
150 each depression symptom since the onset of COVID-19. Response options were 1= “Not at  
151 all”, 2 = “Several days”, 3 = “More than half the days”, 4 = “Most days”, and 5 = “Every day”.

152 Question 3 from the Perceived Stress Scale (PSS) [28] was used to measure  
153 psychological stress. Respondents were asked how often they felt nervous and “stressed”  
154 both prior to and since the onset of COVID-19 on a 5-point scale where 1 = “Never”, 2 =  
155 “Sometimes”, 3 = “Fairly often”, 4 = “Often”, and 5 = “Very often”.

156 To capture an overall change in mental health since the onset of COVID-19,  
157 respondents were asked to rate their overall mental health since COVID in relation to how it  
158 was in the six-months prior to COVID with the options of choosing “Much better”, “Better”, “No  
159 change”, “Worse” , or “Much worse”.

160

## 161 **Statistical Analyses**

162 The IBM SPSS® statistics software platform (Version 26) was used to carry out all  
163 analyses. Descriptive statistics (means and standard deviations for continuous variables, and  
164 frequency counts and percentages for categorical variables) were computed to describe  
165 demographic characteristics, mental health, and physical activity levels. Normality was  
166 assessed using Shapiro-Wilkes tests and through visual inspection of histograms. For all  
167 analyses, significance was considered at  $p < 0.05$ , and nonparametric tests were chosen  
168 wherever data did not meet the assumption of normality.

169 For correlational analysis, all respondents who left 100% of the survey questions blank  
170 were removed (N=166). Physical activity and mental health data were then screened for  
171 missingness which ranged from 8.2-11.8% and 10.2-17.3% respectively. Missing cells were  
172 subsequently imputed using expectation-maximization [29] for all physical activity and mental  
173 health variables. In the case where a negative physical activity datum or score exceeding the  
174 maximum mental health score was imputed, the datum was removed. Physical activity and  
175 mental health data used in correlations had a resulting 0.1-0.5% and 0.1% missingness  
176 respectively.

177

## 178 **Results**

### 179 **Sample characteristics and mental health status**

180 Survey respondents were primarily female between 18-29 years of age, living in  
181 Canada and well-educated (Table 1). Most respondents spent at least four weeks in social  
182 isolation at the time of the survey, and a large portion was currently working regular hours  
183 from home. More respondents reported that they were making “less than enough” since the  
184 onset of the pandemic compared to their income within the 6 months before the pandemic.  
185 Although few respondents indicated a close exposure to someone with COVID-19 or COVID-  
186 19 symptoms, nearly half knew someone immunocompromised and therefore at high risk.

187

188 **Table 1.** Sample Description

*COVID: mental health and physical activity*

6

| <b>Variables</b>                       | <b>N (%)</b> |
|----------------------------------------|--------------|
| <b>Total</b>                           | 1669 (100)   |
| <b>Demographic characteristics</b>     |              |
| <b>Gender</b>                          |              |
| <b>Man</b>                             | 249 (16.8)   |
| <b>Woman</b>                           | 1218 (82.4)  |
| <b>Non-binary</b>                      | 11 (0.7)     |
| <b>Age</b>                             |              |
| <b>18-29</b>                           | 548 (36.9)   |
| <b>30-45</b>                           | 383 (25.8)   |
| <b>46-65</b>                           | 416 (28.0)   |
| <b>65+</b>                             | 137 (9.2)    |
| <b>Relationship Status</b>             |              |
| <b>Single</b>                          | 445 (30.2)   |
| <b>In a relationship</b>               | 389 (26.4)   |
| <b>Married</b>                         | 607 (41.2)   |
| <b>Separated</b>                       | 32 (2.2)     |
| <b>Country of Residence</b>            |              |
| <b>Canada</b>                          | 1271 (85.6)  |
| <b>Other</b>                           | 200 (14.4)   |
| <b>Education</b>                       |              |
| <b>No formal education</b>             | 4 (0.3)      |
| <b>Highschool Diploma</b>              | 266 (18.1)   |
| <b>College Diploma</b>                 | 162 (11.0)   |
| <b>Vocational Training</b>             | 15 (1.0)     |
| <b>Bachelor's Degree</b>               | 528 (35.8)   |
| <b>Master's or Professional Degree</b> | 375 (25.5)   |
| <b>Doctorate or PhD</b>                | 123 (8.4)    |
| <b>Current Role Since COVID</b>        |              |
| <b>Regular Hours</b>                   | 271 (18.0)   |
| <b>Part Time Hours</b>                 | 90 (6.0)     |
| <b>Health Care Provider</b>            | 81 (5.4)     |
| <b>Regular Hours Work from Home</b>    | 415 (27.6)   |
| <b>Part time Hours Work from Home</b>  | 144 (9.6)    |

*COVID: mental health and physical activity*

|                                                |            |
|------------------------------------------------|------------|
| <b>Unemployed</b>                              | 197 (13.1) |
| <b>Laid off</b>                                | 251 (16.7) |
| <b>Full Time Studies</b>                       | 274 (18.2) |
| <b>Part Time Studies</b>                       | 73 (4.9)   |
| <b>Full time Childcare</b>                     | 114 (7.6)  |
| <b>Part Time Childcare</b>                     | 35 (2.3)   |
| <b>Full time care for person w/ disability</b> | 7 (0.5)    |
| <b>Part Time for person w/ disability</b>      | 12 (0.8)   |
| <b>Full time care for elder</b>                | 10 (0.7)   |
| <b>Part Time care for elder</b>                | 43 (2.9)   |
| <b>Retired</b>                                 | 193 (12.8) |
| <b>No Answer</b>                               | 18 (1.2)   |

**Social Isolation Duration**

|                                            |            |
|--------------------------------------------|------------|
| <b>2-4 weeks</b>                           | 42 (2.8)   |
| <b>4-6 weeks</b>                           | 430 (29.1) |
| <b>6-8 weeks</b>                           | 458 (30.9) |
| <b>8+ weeks</b>                            | 472 (31.9) |
| <b>I have not been in social isolation</b> | 78 (5.3)   |

**Income Prior to COVID**

|                         |            |
|-------------------------|------------|
| <b>More than enough</b> | 834 (57.4) |
| <b>Just enough</b>      | 534 (36.8) |
| <b>Less than enough</b> | 84 (5.8)   |

**Income Since COVID**

|                         |            |
|-------------------------|------------|
| <b>More than enough</b> | 717 (49.3) |
| <b>Just enough</b>      | 554 (38.1) |
| <b>Less than enough</b> | 183 (12.6) |

**Relationship to Epidemic Contact**

|                                                                        |            |
|------------------------------------------------------------------------|------------|
| <b>Someone you know has COVID</b>                                      | 40 (2.7)   |
| <b>Someone you know has had COVID symptoms</b>                         | 53 (3.5)   |
| <b>Someone you know is a Health Care Professional working w/ COVID</b> | 241 (16.0) |
| <b>Someone you know is immunocompromised</b>                           | 627 (41.7) |
| <b>No Answer</b>                                                       | 16 (1.1)   |

COVID: mental health and physical activity

191 **Impact of the pandemic on mental health status**

192 Average anxiety (19.0±0.2, max = 35) and depression (20.2±0.2, max = 40) scores  
 193 reflect moderate symptoms for both anxiety and depression. Tables 2 and 3 show positive  
 194 correlations between anxiety and depression from the onset of the pandemic revealing that  
 195 individuals with more anxiety symptoms also had more depressive symptoms. To identify  
 196 respondents at higher risk for mental illness during the pandemic, Kruskal-Wallis one-way  
 197 ANOVA evaluated between-group differences in anxiety and depression by age and income.  
 198 With respect to age, respondents aged 18-29 experienced significantly higher anxiety than  
 199 those 30-45 ( $H(4,1310)= 2.85, p = < 0.01$ ), 46-65 ( $H(4,1310)= 4.15, p = < 0.01$ ), and 65+  
 200 ( $H(4,1310)= 7.85, p = < 0.01$ ). The same pattern was seen in depression, wherein those aged  
 201 18-29 experienced higher depression than those 30-45 ( $H(4,1278)= 5.13, p = < 0.01$ ), 46-65  
 202 ( $H(4,1278)= 5.92, p = < 0.01$ ), and 65+ ( $H(4,1278)= 7.61, p = < 0.01$ ). With respect to income,  
 203 respondents making “less than enough” had significantly higher levels of anxiety and  
 204 depression than those making “just enough” ( $H(3,1310) = 6.93, p < 0.01$ ;  $H(3,1278) = 9.19, p$   
 205  $< 0.01$ ) and “more than enough” ( $H(3,1310) = 8.64, p < 0.01$ ;  $H(3,1278) = 10.96, p < 0.01$ ). As  
 206 well, respondents making “just enough” had significantly higher anxiety and depression than  
 207 those making “more than enough” ( $H(3,1310) = -3.71 p < 0.01$ ;  $H(3,1278) = -4.40, p < 0.01$ ).  
 208

209 **Table 2.** Correlations between physical activity, sedentary behaviour and mental health  
 210

|   |                               | 1       | 2       | 3       | 4       | 5       | 6      | 7      | 8 |
|---|-------------------------------|---------|---------|---------|---------|---------|--------|--------|---|
| 1 | <b>MVPA</b> before COVID      | -       |         |         |         |         |        |        |   |
| 2 | <b>ST</b> before COVID        | 0.44**  | -       |         |         |         |        |        |   |
| 3 | <b>Sedentary</b> before COVID | -0.16*  | -0.17** | -       |         |         |        |        |   |
| 4 | <b>MVPA</b> during COVID      | 0.47**  | 0.22**  | -0.10** | -       |         |        |        |   |
| 5 | <b>ST</b> during COVID        | 0.231** | 0.47**  | -0.05*  | 0.42**  | -       |        |        |   |
| 6 | <b>Sedentary</b> during COVID | -0.06*  | -0.01   | 0.60**  | -0.24** | -0.16** | -      |        |   |
| 7 | <b>GAD-7</b> during COVID     | -0.05   | -0.04   | 0.02    | -0.18** | -0.14** | 0.10** | -      |   |
| 8 | <b>PHQ-9</b> during COVID     | -0.11** | -0.06*  | 0.02    | -0.31** | -0.21** | 0.16** | 0.77** | - |

211  
 212 *Note:* Values are Spearman’s correlation coefficients. MVPA: moderate and vigorous physical activity.  
 213 ST: strength training, PA: physical activity, GAD-7: generalized anxiety disorder 7-item scale, PHQ-9:  
 214 patient health questionnaire. \* $p < 0.05$  and \*\* $p < 0.01$ .  
 215

216 **Table 3.** Correlations between changes in physical activity and current mental health status.

| 1 | 2 | 3 | 4 | 5 | 6 |
|---|---|---|---|---|---|
|---|---|---|---|---|---|



## COVID: mental health and physical activity

|   |                    |         |         |         |        |        |
|---|--------------------|---------|---------|---------|--------|--------|
| 1 | $\Delta$ MVPA      | -       |         |         |        |        |
| 2 | $\Delta$ ST        | 0.34**  | -       |         |        |        |
| 3 | $\Delta$ Total PA  | 0.87**  | 0.67**  | -       |        |        |
| 4 | $\Delta$ Sedentary | -0.16** | -0.24** | -0.23** | -      |        |
| 5 | GAD-7 during COVID | -0.12** | -0.11** | -0.14** | 0.07** | -      |
| 6 | PHQ-9 during COVID | -0.21** | -0.16** | -0.23** | 0.12** | 0.77** |

217

218 *Note:* Values are Spearman's correlation coefficients. MVPA: moderate and vigorous physical activity.  
 219 ST: strength training, PA: physical activity, GAD-7: generalized anxiety disorder 7-item scale, PHQ-9:  
 220 patient health questionnaire. \* $p < 0.05$  and \*\* $p < 0.01$ .

221

222 To assess changes in self-perceived psychological stress, a Wilcoxon Signed Ranks  
 223 Test was performed on ratings before and during the initial stages of the COVID-19 pandemic  
 224 and McNemar's tests were used to assess changes in frequencies. There was a significant  
 225 increase in stress levels during the pandemic ( $Z = -17.00$ ,  $p < 0.01$ ) (Figure 1). Since the  
 226 onset of COVID-19, 22% of respondents who had felt stressed "sometimes" ( $p < 0.01$ ) now  
 227 felt stressed "often" (+7%;  $p < 0.01$ ) or "very often" (+17%;  $p < 0.01$ ) (Figure 2). The pandemic  
 228 did not impact the number of respondents who reported "never" ( $p = 0.13$ ) feeling stressed or  
 229 feeling stressed "fairly often" ( $p = 0.28$ ).

230

231 **Fig 1.** Psychological stress increased significantly during the COVID-19 pandemic (\*\* $p <$   
 232 0.01). Error bars represent standard error.

233

234 **Fig 2.** Changes in self-report psychological stress before and during the COVID-19 pandemic.  
 235 55% of respondents indicated their overall mental health had gotten "worse" or "much worse"  
 236 during the COVID-19 pandemic (\*\* $p < 0.01$ ).

237

238

## 239 Impact of the pandemic on physical activity and sedentary behaviour

240 To test the hypothesis that physical activity levels dropped during the initial stages of  
 241 the COVID-19 pandemic, Wilcoxon Signed Rank statistics were computed on changes in  
 242 aerobic activity, strength training activity and sedentary behaviour and McNemar's tests were  
 243 used to assess the change in self-identified exercise status. Since the onset of COVID-19,  
 244 respondents' aerobic activity decreased by 22 minutes (-11%;  $Z = -2.50$ ,  $p < 0.05$ ), their  
 245 strength-based activity decreased by 32 minutes (-30%;  $Z = -7.89$ ,  $p < 0.01$ ), and their  
 246 sedentary times increased by 33 minutes (+11%;  $Z = -14.18$ ,  $p < 0.01$ ) (Figures 3 and 4).

## COVID: mental health and physical activity

247 Respondents who had been “recreational athletes” (-6%;  $p < 0.01$ ), “very active” (-6%;  $p <$   
248 0.01), or “moderately active” (-5%;  $p < 0.01$ ) before the pandemic, now identify as being  
249 “completely sedentary” (+17%;  $p < 0.01$ ). There was no change in the frequency of  
250 respondents who self-identified as “elite athletes” ( $p = 0.12$ ) (Figure 5). Tables 2 and 3 show  
251 correlations between physical activity and sedentary behaviour both before and during the  
252 COVID-19 pandemic. Although total physical activity decreased during COVID-19, each  
253 respondents’ physical activity level remained proportional to their activity level prior to the  
254 pandemic.

255

256 **Fig 3.** Changes in physical activity levels before and during the COVID-19 pandemic.

257 There was a significant decrease in both moderate-to-vigorous physical aerobic activity  
258 (MVPA;  $*p < 0.05$ ) and strength training (ST;  $**p < 0.01$ ). Error bars represent standard error.

259

260 **Fig 4.** Average sedentary activity before and during the COVID-19 pandemic.

261 There was a significant increase in sedentary activity reported by respondents since the  
262 COVID-19 pandemic ( $Z = -14.18$ ,  $**p < 0.01$ ). Error bars represent standard error.

263

264 **Fig 5.** Self-report exercise status before and during the COVID-19 pandemic.

265 17% of respondents who had been “recreational athletes” (-6%;  $**p < 0.01$ ), “very active” (-  
266 6%;  $**p < 0.01$ ), or “moderately active” (-5%;  $**p < 0.01$ ), now identify as being “completely  
267 sedentary” ( $**p < 0.01$ ).

268

269 To identify respondents at higher risk for decreased physical activity during the initial  
270 stage of the COVID-19 pandemic, Kruskal-Wallis tests were conducted on between-group  
271 differences in physical activity change by income and age. Respondents who made “less than  
272 enough” ( $H(3,1384) = -3.60$ ,  $p < 0.01$ ) or “just enough” ( $H(3,1384) = -2.96$ ,  $p < 0.01$ ) income  
273 to meet their needs had significantly lower levels of MVPA during COVID-19 than those  
274 making “more than enough”. Although this trend was seen overall, the effect was largest for  
275 the 18-29 age group. A similar trend was observed in sedentary behaviour wherein those who  
276 made “less than enough” experienced greater increases in daily sedentary time compared to  
277 those who made “more than enough” ( $H(3,1422) = 95.14$ ,  $p < 0.01$ ), and those who made  
278 “just enough” also had elevated sedentary time compared to those who made “more than  
279 enough” ( $H(3,1422) = 56.61$ ,  $p < 0.05$ ). Similarly, those aged 18-29 reported the greatest  
280 sedentary time during the COVID-19 pandemic compared to any other age group.

281

282 **Did physical activity and sedentary behaviour predict mental health during**  
283 **the pandemic?**

## COVID: mental health and physical activity

284 When examining the change in total physical activity level split by the change in mental  
285 health status, respondents whose mental health got “worse” or “much worse” had greater  
286 reductions in physical activity since COVID-19 than those who experienced “no change” or  
287 got “better” or “much better” (Figure 6;  $H(5,1381) = 7.23, p < 0.01$ ;  $H(5,1381) = 6.23, p <$   
288  $0.01$ ).

289

290 **Fig 6.** Change in total physical activity by change in mental health status.

291 Respondents whose mental health got “worse” or “much worse” had greater reductions in  
292 physical activity time since COVID-19 compared to those who experienced “no change” or got  
293 “better” or “much better” ( $p < 0.01$ ).

294

295 Spearman’s rank-order correlations were conducted assessing relationships between  
296 physical activity (prior, during, change) with mental health status (Tables 2 and 3). Overall,  
297 respondents who reported a greater decrease in their aerobic and strength-based physical  
298 activity during the pandemic also experienced more anxiety and depression ( $r(1544) = -0.12, p$   
299  $< 0.01$ ;  $r(1544) = -0.21, p < 0.01$ ). This was not only reflected their activity levels during the  
300 pandemic (i.e., people who engaged in less physical activity *during* the pandemic were more  
301 anxious and depressed; MVPA:  $r(1540) = -0.18, p < 0.01$ ;  $r(1540) = -0.31, p < 0.01$ ; ST:  
302  $r(1542) = -0.14, p < 0.01$ ;  $r(1542) = -0.22, p < 0.01$ ); but also before (i.e., those who engaged in  
303 less physical activity *before* the pandemic were more depressed *during* the pandemic;  
304  $r(1539) = -0.11, p < 0.01$ ;  $r(1537) = -0.06, p < 0.01$ ). Similar patterns in anxiety and depression  
305 were observed for those who experienced greater increases in sedentary behaviour, such  
306 that greater changes in sedentary time were associated with greater anxiety and depression  
307 during the pandemic ( $r(1420) = 0.07, p < 0.01$ ;  $r(1420) = 0.12, p < 0.01$ ).

308

## 309 **Impact of the pandemic on barriers and motivators to physical activity**

310 To determine whether there were significant changes in the motivators and barriers to  
311 engage in physical activity due to COVID-19, McNemar’s tests were conducted. With respect  
312 to changes in motivators, respondents reported being less motivated to be physically active  
313 for ‘weight loss’ (-7%;  $p < 0.01$ ), ‘strength building’ (-14%;  $p < 0.01$ ), ‘enjoyment’ (-9%;  $p <$   
314  $0.01$ ), ‘appearance goals’ (down 4%;  $p < 0.01$ ), ‘social engagement’ (-21%;  $p < 0.01$ ), ‘sports  
315 training’ (down 5%;  $p < 0.01$ ), and ‘healthcare provider recommended’ (-2%;  $p < 0.01$ ). In  
316 contrast, respondents reported being more motivated to be physically active for ‘stress  
317 reduction’ (+5%;  $p < 0.01$ ), ‘anxiety-relief’ (+14%;  $p < 0.01$ ), ‘improve sleep’ (+4%;  $p < 0.05$ ),  
318 and ‘no motivators’ (+4%;  $p < 0.01$ ) (Figure 7). Viewing ‘increased energy’ as a motivator to  
319 engage in physical activity did not change during the pandemic ( $p > 0.05$ ).

320

321 **Fig 7.** Changes in motivators to exercise before and during COVID-19.

322 All motivators shown indicate a significant change ( $*p < 0.05, **p < 0.01$ ). Motivators that  
323 increased significantly include ‘stress reduction’, ‘anxiety relief’, ‘improve sleep’ and ‘no

## COVID: mental health and physical activity

324 motivators'. Motivators that decreased significantly include 'weight loss', 'strength building',  
325 'enjoyment', 'appearance goals', 'social engagement', 'sports training' and 'healthcare  
326 provider (HCP) recommended'. There was no change in how 'increase energy' was viewed as  
327 a motivator to exercise during the pandemic ( $p > 0.05$ ).

328  
329 With respect to barriers, respondents reported decreases in 'insufficient time' (-23%;  $p$   
330  $< 0.01$ ), 'no barriers' (-10%;  $p < 0.01$ ), 'lack of confidence' (-2%;  $p < 0.01$ ), 'recent injury' (-3%;  
331  $p < 0.01$ ) and 'insufficient finances' (-3%;  $p < 0.01$ ). In contrast, respondents reported  
332 increases in 'lack of motivation' (+8%;  $p < 0.01$ ), 'no facility access' (+41%;  $p < 0.01$ ), 'no  
333 equipment' (+23%;  $p < 0.01$ ), 'increased anxiety' (+8%;  $p < 0.01$ ), and 'lack of support' (+6%;  
334  $p < 0.01$ ). Barriers to engage in physical activity including 'no access to childcare', 'lack of  
335 enjoyment' and 'fear of injury' did not change because of the pandemic (Figure 8).

336  
337 **Fig 8.** Changes in barriers to exercise before and during COVID-19.

338 All barriers listed showed a significant change (\*\* $p < 0.01$ ). Barriers which increased  
339 significantly since COVID-19 include 'lack of motivation', 'no facility access', 'no equipment',  
340 'increased anxiety' and 'lack of support'. Barriers which decreased significantly during COVID-  
341 19 include 'insufficient time', 'no barriers', 'lack of confidence', 'recent injury' and 'insufficient  
342 finances'. No change in barriers related to 'lack of enjoyment', 'no access to childcare' and  
343 'fear of injury' ( $p > 0.05$ ).

344  
345 As an exploratory analysis, we conducted a series of linear regressions to determine  
346 whether self-reported levels of anxiety and depression predicted self-perceived barriers and  
347 motivators to exercise, and they did. Respondents who reported greater depressive  
348 symptoms were more likely to endorse 'lack of self-motivation' as a barrier to engaging in  
349 physical activity during the pandemic ( $F(1,1283) = 29.97$ ,  $p < 0.01$ ,  $R^2 = 0.02$ ). Respondents  
350 who reported greater symptoms of anxiety were more likely to endorse 'stress relief' as a  
351 motivator ( $F(1,1282) = 26.05$ ,  $p < 0.01$ ,  $R^2 = 0.02$ ) and 'anxiety' as a barrier ( $F(1,1283) = 7.16$ ,  
352  $p < 0.01$ ,  $R^2 = 0.01$ ) to engage in physical activity during the pandemic.

353

## 354 Discussion

355 The present study examined the effect of the COVID-19 pandemic on the mental  
356 health, physical activity, and sedentary behavior of individuals undergoing pandemic  
357 lockdowns and physical distancing measures. Respondents reported higher psychological  
358 stress and moderate levels of anxiety and depression brought on by the pandemic. At the  
359 same time, the pandemic made it more difficult for them to be active, with aerobic activity  
360 down 11%, strength training down 30%, and sedentary time up 17%. Critically, respondents  
361 whose physical activity declined the most during the pandemic also experienced the worse

## *COVID: mental health and physical activity*

362 mental health outcomes. Whereas, the respondents who maintained their physical activity  
363 levels, despite the pandemic, fared much better mentally.

364 Why was it so difficult for people to stay active during the pandemic? To address this  
365 important question, we assessed barriers and motivators to being physically active that may  
366 have changed during the pandemic. Overall, respondents were not motivated to be physically  
367 active because they felt too anxious and lacked social support. Respondents who were able  
368 to maintain their activity levels noticed a shift in what motivated them: they were less  
369 motivated by physical health and appearance, and more motivated by mental health and  
370 wellbeing. Stress relief, anxiety reduction, and sleep improvements were among the top  
371 motivators that increased during the pandemic, and indeed, research supports the use of  
372 physical activity for brain health [30] stress management [31] and sleep quality [32].

373 However, our results highlighted a paradox with mental health being both a motivator  
374 and barrier to physical activity. People wanted to be active to improve their mental health but  
375 found it difficult to be active due to their poor mental health. For example, despite the  
376 anxiolytic effects of exercise [30], respondents viewed their anxiety as a barrier to being  
377 physically active. Likewise, respondents who were more depressed were also less motivated  
378 to engage in physical activity, and amotivation is a symptom of depression itself. Although this  
379 is not a new challenge for clinicians whose depressed patients struggle to adhere to a  
380 prescribed exercise program [33], the stressfulness of the pandemic has made this a global  
381 issue that now must be considered when devising physical activity programs to support the  
382 mental wellbeing of citizens.

383 Was the drop in physical activity from the pandemic a cause or consequence of  
384 worsened mental health? Although this study cannot answer that question, it suggests the  
385 benefits of a two-pronged approach in promoting physical activity during stressful times that  
386 includes: 1) adopting a mode of physical activity that supports mental health, and 2) providing  
387 support to help minimize perceived psychological barriers to exercise [34]. For example,  
388 symptoms of anxiety may increase with high-intensity exercise and therefore moderate-  
389 intensity exercise might be preferable [35]. At the same time, to help overcome “feeling too  
390 anxious to exercise”, people should be encouraged to schedule their physical activity ahead  
391 of time in a calendar [36] to reduce feelings of uncertainty and decision fatigue that can  
392 aggravate their anxiety symptoms [37].

393 Not surprisingly, government-mandated closure to gyms and other recreational training  
394 facilities made it more difficult for people to be physically active. This was realized as a lack of  
395 necessary space and equipment during the pandemic reported as major barriers to being  
396 physically active. The pandemic forced a shift in doing everything at home but not everyone’s  
397 home is large enough or well-equipped to support their physical activity needs. Indeed,  
398 income level was predictive of activity level during the pandemic. People who reported “just  
399 enough” or “less than enough” income experienced greater decreases in physical activity and  
400 worsening mental health, especially younger adults aged 18 to 29 years old. Interestingly,  
401 these findings do not mirror the common trend that physical activity level declines with age  
402 [17] and instead, highlight a potential interaction between age and income that may reveal  
403 unique barriers to being physical activity. It is plausible that younger adults who typically work

## *COVID: mental health and physical activity*

404 longer hours and earn less wage, are lacking both the time (e.g., due to long hours) and  
405 space (e.g., smaller dwelling) to meet physical activity goals. Outdoor activity could be a  
406 viable substitute [38], although this was not permitted in some countries during the pandemic  
407 [39]. Furthermore, increasing the number of repetitions performed during resistance training  
408 exercises can serve to adjust relative training intensity if lack of equipment is perceived as a  
409 barrier [40].

410 On top of being less active, our respondents reported spending significantly more time  
411 seated. The pandemic increased sedentary time by 10% or approximately 30 minutes per  
412 day. Although this may not seem like a lot, increasing sedentary time by just one hour has  
413 been associated with a 12% greater risk of mortality over a 6-year period [41]. But sedentary  
414 behavior is not only associated with poor physical health [42], it is also associated with poor  
415 mental health including lower perceived ratings of mental health and poorer quality of life [43].  
416 Prolonged periods of sedentary behavior increase inflammatory markers [44] that may  
417 exacerbate symptoms of depression and anxiety [45]. Breaking up sedentary time with short  
418 frequent breaks (e.g., 1-2 minutes every half hour) may be sufficient to negate the negative  
419 health outcomes sedentary behaviour. Research shows that shorter frequent breaks are  
420 easier to adhere to than longer infrequent breaks [46] and can reduce sedentary behavior by  
421 more than 35 minutes per day, which would be enough to counteract the reported increase  
422 observed in this study.

423 Despite the valuable insights provided by this study; it is not without limitations. Our  
424 sample consisted mainly of young (18-29), highly educated (Bachelor's degree or higher),  
425 female-identifying Canadian inhabitants which may limit the generalizability of the results. On  
426 average, our respondents were meeting the physical activity recommendations [16], which is  
427 not representative of the population at large. Moreover, a self-reported web-based survey was  
428 used to collect data and therefore response accuracy was unverifiable, and respondents  
429 required a device to access the internet; however, our large sample size would help minimize  
430 the impact of individual bias in reporting.

431 In conclusion, our findings highlight the importance of physical activity in mental  
432 health. During stressful times, like the COVID-19 pandemic, people are motivated to be  
433 physically active for their mental health but may be too anxious or depressed to partake. Our  
434 results point to the need for additional psychological supports to help people maintain their  
435 physical activity levels during stressful times in order to minimize the psychological burden of  
436 the pandemic and prevent the development of a mental health crisis.

437

## **Acknowledgments**

438

439  
440 The authors wish to thank Samantha Choy for helping with data collection and management,  
441 and Paulina Rzeczowska for helping create the tables and graphics.

442

## **References**

443

- 444 1. Guidance on Essential Services and Functions in Canada During the COVID-19  
445 Pandemic. Public Safety Canada / Sécurité publique Canada [Internet]. 2020.  
446 Available from: [https://www.publicsafety.gc.ca/cnt/ntnl-scrtr/crtcl-nfrstrctr/esf-sfe-  
448 en.aspx](https://www.publicsafety.gc.ca/cnt/ntnl-scrtr/crtcl-nfrstrctr/esf-sfe-<br/>447 en.aspx).
- 449 2. Casagrande M, Favieri F, Tambelli R, Forte G. The enemy who sealed the world:  
450 effects quarantine due to the COVID-19 on sleep quality, anxiety, and psychological  
451 distress in the Italian population. *Sleep Med.* 2020; 75:12–20.
- 452 3. Huang Y, Zhao N. Generalized anxiety disorder, depressive symptoms, and sleep  
453 quality during COVID-19 outbreak in China: a web-based cross-sectional survey.  
454 *Psychiatry Res.* 2020; 288:112954.
- 455 4. Jungmann SM, Witthöft M. Health anxiety, cyberchondria, and coping in the current  
456 COVID-19 pandemic: Which factors are related to coronavirus anxiety? *J Anxiety  
457 Disord.* 2020; 73:102239.
- 458 5. Luo M, Guo L, Yu M, Jiang W, Wang H. The psychological and mental impact of  
459 coronavirus disease 2019 (COVID-19) on medical staff and general public – A  
460 systematic review and meta-analysis. *Psychiatry Res.* 2020; 291:113190.
- 461 6. Mazza C, Ricci E, Biondi S, Colasanti M, Ferracuti S, Napoli C, et al. A Nationwide  
462 Survey of Psychological Distress among Italian People during the COVID-19  
463 Pandemic: Immediate Psychological Responses and Associated Factors. *Int J Env  
464 Res Pub He.* 2020; 17(9):3165.
- 465 7. Newby JM, O'Moore K, Tang S, Christensen H, Faasse K. Acute mental health  
466 responses during the COVID-19 pandemic in Australia. *Plos One.* 2020; 15(7).
- 467 8. Rajkumar RP. COVID-19 and mental health: A review of the existing literature. *Asian  
468 J Psychiatr.* 2020; 52:102066.
- 469 9. Xiang Y-T, Yang Y, Li W, Zhang L, Zhang Q, Cheung T, et al. Timely mental health  
470 care for the 2019 novel coronavirus outbreak is urgently needed. *Lancet Psychiat.*  
471 2020; 7(3):228–9.
- 472 10. Keyes CL, Westerhof GJ. Chronological and subjective age differences in flourishing  
473 mental health and major depressive episode. *Aging Ment Health.* 2011; 16(1):67–74.
- 474 11. Lauder W, Kroll T, Jones M. Social determinants of mental health: the missing  
475 dimensions of mental health nursing? *J Psychiatr Ment Health Nurs.* 2007;  
476 14(7):661–9.
- 477 12. Galea S, Merchant RM, Lurie N. The Mental Health Consequences of COVID-19 and  
478 Physical Distancing. *JAMA Intern Med.* 2020; 180(6):817.
- 479 13. Hiles SA, Lamers F, Milaneschi Y, Penninx BWJH. Sit, step, sweat: longitudinal  
480 associations between physical activity patterns, anxiety and depression. *Psychol  
481 Med.* 2017; 47(8):1466–77.
- 482 14. Kvam S, Kleppe CL, Nordhus IH, Hovland A. Exercise as a treatment for depression:  
483 A meta-analysis. *J Affect Disord.* 2016; 202:67–86.
- 484 15. Netz Y. Is the Comparison between Exercise and Pharmacologic Treatment of  
485 Depression in the Clinical Practice Guideline of the American College of Physicians  
Evidence-Based? *Front Pharmacol.* 2017; 8.

- 486 16. Global recommendations on physical activity for health. Geneva: World Health  
487 Organization; 2010.
- 488 17. Statistics Canada. [Table 13-10-0096-01 Health characteristics, annual estimates](#)
- 489 18. Spinney J, Millward H. Time and Money: A New Look at Poverty and the Barriers to  
490 Physical Activity in Canada. *Soc Indic Res.* 2010; 99(2):341–56.
- 491 19. Cheval B, Sivaramakrishnan H, Maltagliati S, Fessler L, Forestier C, Sarrazin P, et  
492 al. Relationships Between Changes in Self-Reported Physical Activity and Sedentary  
493 Behaviours and Health During the Coronavirus (COVID-19) Pandemic in France and  
494 Switzerland [Internet]. *SportRxiv*; 2020. Available from:  
495 [osf.io/preprints/sportrxiv/ydv84](https://osf.io/preprints/sportrxiv/ydv84).
- 496 20. Morgan JA, Singhal G, Corrigan F, Jaehne EJ, Jawahar MC, Breen J, et al. Ceasing  
497 exercise induces depression-like, anxiety-like, and impaired cognitive-like behaviours  
498 and altered hippocampal gene expression. *Brain Res Bull.* 2019; 148:118–30.
- 499 21. Weinstein AA, Koehmstedt C, Kop WJ. Mental health consequences of exercise  
500 withdrawal: A systematic review. *Gen Hosp Psychiatry.* 2017; 49:11–8.
- 501 22. Lesser IA, Nienhuis CP. The Impact of COVID-19 on Physical Activity Behavior and  
502 Well-Being of Canadians. *Int J Env Res Pub He.* 2020; 17(11):3899.
- 503 23. Colley RC, Bushnik T, Langlois K. Exercise and screen time during the COVID-19  
504 pandemic. *Statistics Canada Health Reports.* 2020;31: 6. Available from:  
505 <https://www150.statcan.gc.ca/n1/pub/82-003-x/2020006/article/00001-eng.htm>.
- 506 24. Justine M, Azizan A, Hassan V, Salleh Z, Manaf H. Barriers to participation in  
507 physical activity and exercise among middle-aged and elderly individuals. *Singapore*  
508 *Med J.* 2013; 54(10):581–6.
- 509 25. Fowles JR, O'Brien MW, Wojcik WR, D'Entremont L, Shields CA. A pilot study:  
510 Validity and reliability of the CSEP–PATH PASB-Q and a new leisure time physical  
511 activity questionnaire to assess physical activity and sedentary behaviours. *Appl*  
512 *Physiol Nutr Me.* 2017; 42(6):677–80.
- 513 26. Spitzer RL, Kroenke K, Williams JBW, Löwe B. A Brief Measure for Assessing  
514 Generalized Anxiety Disorder. *Arch Intern Med.* 2006; 166(10):1092.
- 515 27. Kroenke K, Spitzer RL. The PHQ-9: A New Depression Diagnostic and Severity  
516 Measure. *Psychiatr Ann.* 2002; 32(9):509–15.
- 517 28. Cohen S, Kamarck T, Mermelstein R. A Global Measure of Perceived Stress. *J*  
518 *Health Soc Behav.* 1983; 24(4):385.
- 519 29. Tabachnick BG, Fidell LS. *Using multivariate statistics.* Pearson/Allyn & Bacon;  
520 2007.
- 521 30. Rebar AL, Stanton R, Geard D, Short C, Duncan MJ, Vandelanotte C. A meta-meta-  
522 analysis of the effect of physical activity on depression and anxiety in non-clinical  
523 adult populations. *Health Psychol Rev.* 2015; 9(3):366–78.
- 524 31. Rimmele U, Seiler R, Marti B, Wirtz PH, Ehlert U, Heinrichs M. The level of physical  
525 activity affects adrenal and cardiovascular reactivity to psychosocial stress.  
526 *Psychoneuroendocrinology.* 2009; 34(2):190–8.
- 527 32. Kredlow MA, Capozzoli MC, Hearon BA, Calkins AW, Otto MW. The effects of  
528 physical activity on sleep: a meta-analytic review. *J Behav Med.* 2015; 38(3):427–49.



- 529 33. Glazer KM, Emery CF, Frid DJ, Banyasz RE. Psychological Predictors of Adherence  
530 and Outcomes Among Patients in Cardiac Rehabilitation. *J Cardiopulm Rehabil.*  
531 2002; 22(1):40–6.
- 532 34. Marcus B, Forsyth LA. Motivating people to be physically active. *Human Kinetics;*  
533 2009.
- 534 35. Paolucci EM, Loukov D, Bowdish DM, Heisz JJ. Exercise reduces depression and  
535 inflammation but intensity matters. *Biol Psychol.* 2018; 133:79–84.
- 536 36. Arbour KP, Ginis KAM. Helping Middle-Aged Women Translate Physical Activity  
537 Intentions Into Action: Combining the Theory of Planned Behavior and  
538 Implementation Intentions. *J App Biobehav Res.* 2007; 9(3):172–87.
- 539 37. Ajzen I. The theory of planned behavior. *Organizational Behavior and Human*  
540 *Decision Processes.* 1991; 50(2):179–211.
- 541 38. Pasanen TP, Tyrväinen L, Korpela KM. The Relationship between Perceived Health  
542 and Physical Activity Indoors, Outdoors in Built Environments, and Outdoors in  
543 Nature. *Appl Psychol Health Well-Being.* 2014; 6(3):324–46.
- 544 39. Slater SJ, Christiana RW, Gustat J. Recommendations for Keeping Parks and Green  
545 Space Accessible for Mental and Physical Health During COVID-19 and Other  
546 Pandemics. *Prev Chronic Dis.* 2020; 17.
- 547 40. Burd NA, Holwerda AM, Selby KC, West DWD, Staples AW, Cain NE, et al.  
548 Resistance exercise volume affects myofibrillar protein synthesis and anabolic  
549 signalling molecule phosphorylation in young men. *J Physiol.* 2010; 588(16):3119–  
550 30.
- 551 41. Matthews CE, Keadle SK, Troiano RP, Kahle L, Koster A, Brychta R, et al.  
552 Accelerometer-measured dose-response for physical activity, sedentary time, and  
553 mortality in US adults. *Am J Clin Nutr.* 2016; 104(5):1424–32.
- 554 42. Rezende LFMD, Lopes MR, Rey-López JP, Matsudo VKR, Luiz ODC. Sedentary  
555 Behavior and Health Outcomes: An Overview of Systematic Reviews. *Plos One.*  
556 2014; 9(8).
- 557 43. Gibson A-M, Muggeridge DJ, Hughes AR, Kelly L, Kirk A. An examination of  
558 objectively-measured sedentary behavior and mental well-being in adults across  
559 week days and weekends. *Plos One.* 2017; 12(9).
- 560 44. Stubbs B, Gardner-Sood P, Smith S, Ismail K, Greenwood K, Farmer R, et al.  
561 Sedentary behaviour is associated with elevated C-reactive protein levels in people  
562 with psychosis. *Schizophr Res.* 2015; 168(1-2):461–4.
- 563 45. Copeland WE, Shanahan L, Worthman C, Angold A, Costello EJ. Generalized  
564 anxiety and C-reactive protein levels: a prospective, longitudinal analysis. *Psychol*  
565 *Med.* 2012; 42(12):2641–50.
- 566 46. Mailey EL, Rosenkranz SK, Casey K, Swank A. Comparing the effects of two  
567 different break strategies on occupational sedentary behavior in a real world setting:  
568 A randomized trial. *Prev Med Rep.* 2016; 4:423–8.
- 569  
570

571 **S1 Appendix. Barriers and motivators survey questions.**

572

bioRxiv preprint doi: <https://doi.org/10.1101/2020.09.03.280719>; this version posted September 3, 2020. The copyright holder for this preprint (which was not certified by peer review) is the author/funder, who has granted bioRxiv a license to display the preprint in perpetuity. It is made available under aCC-BY 4.0 International license.

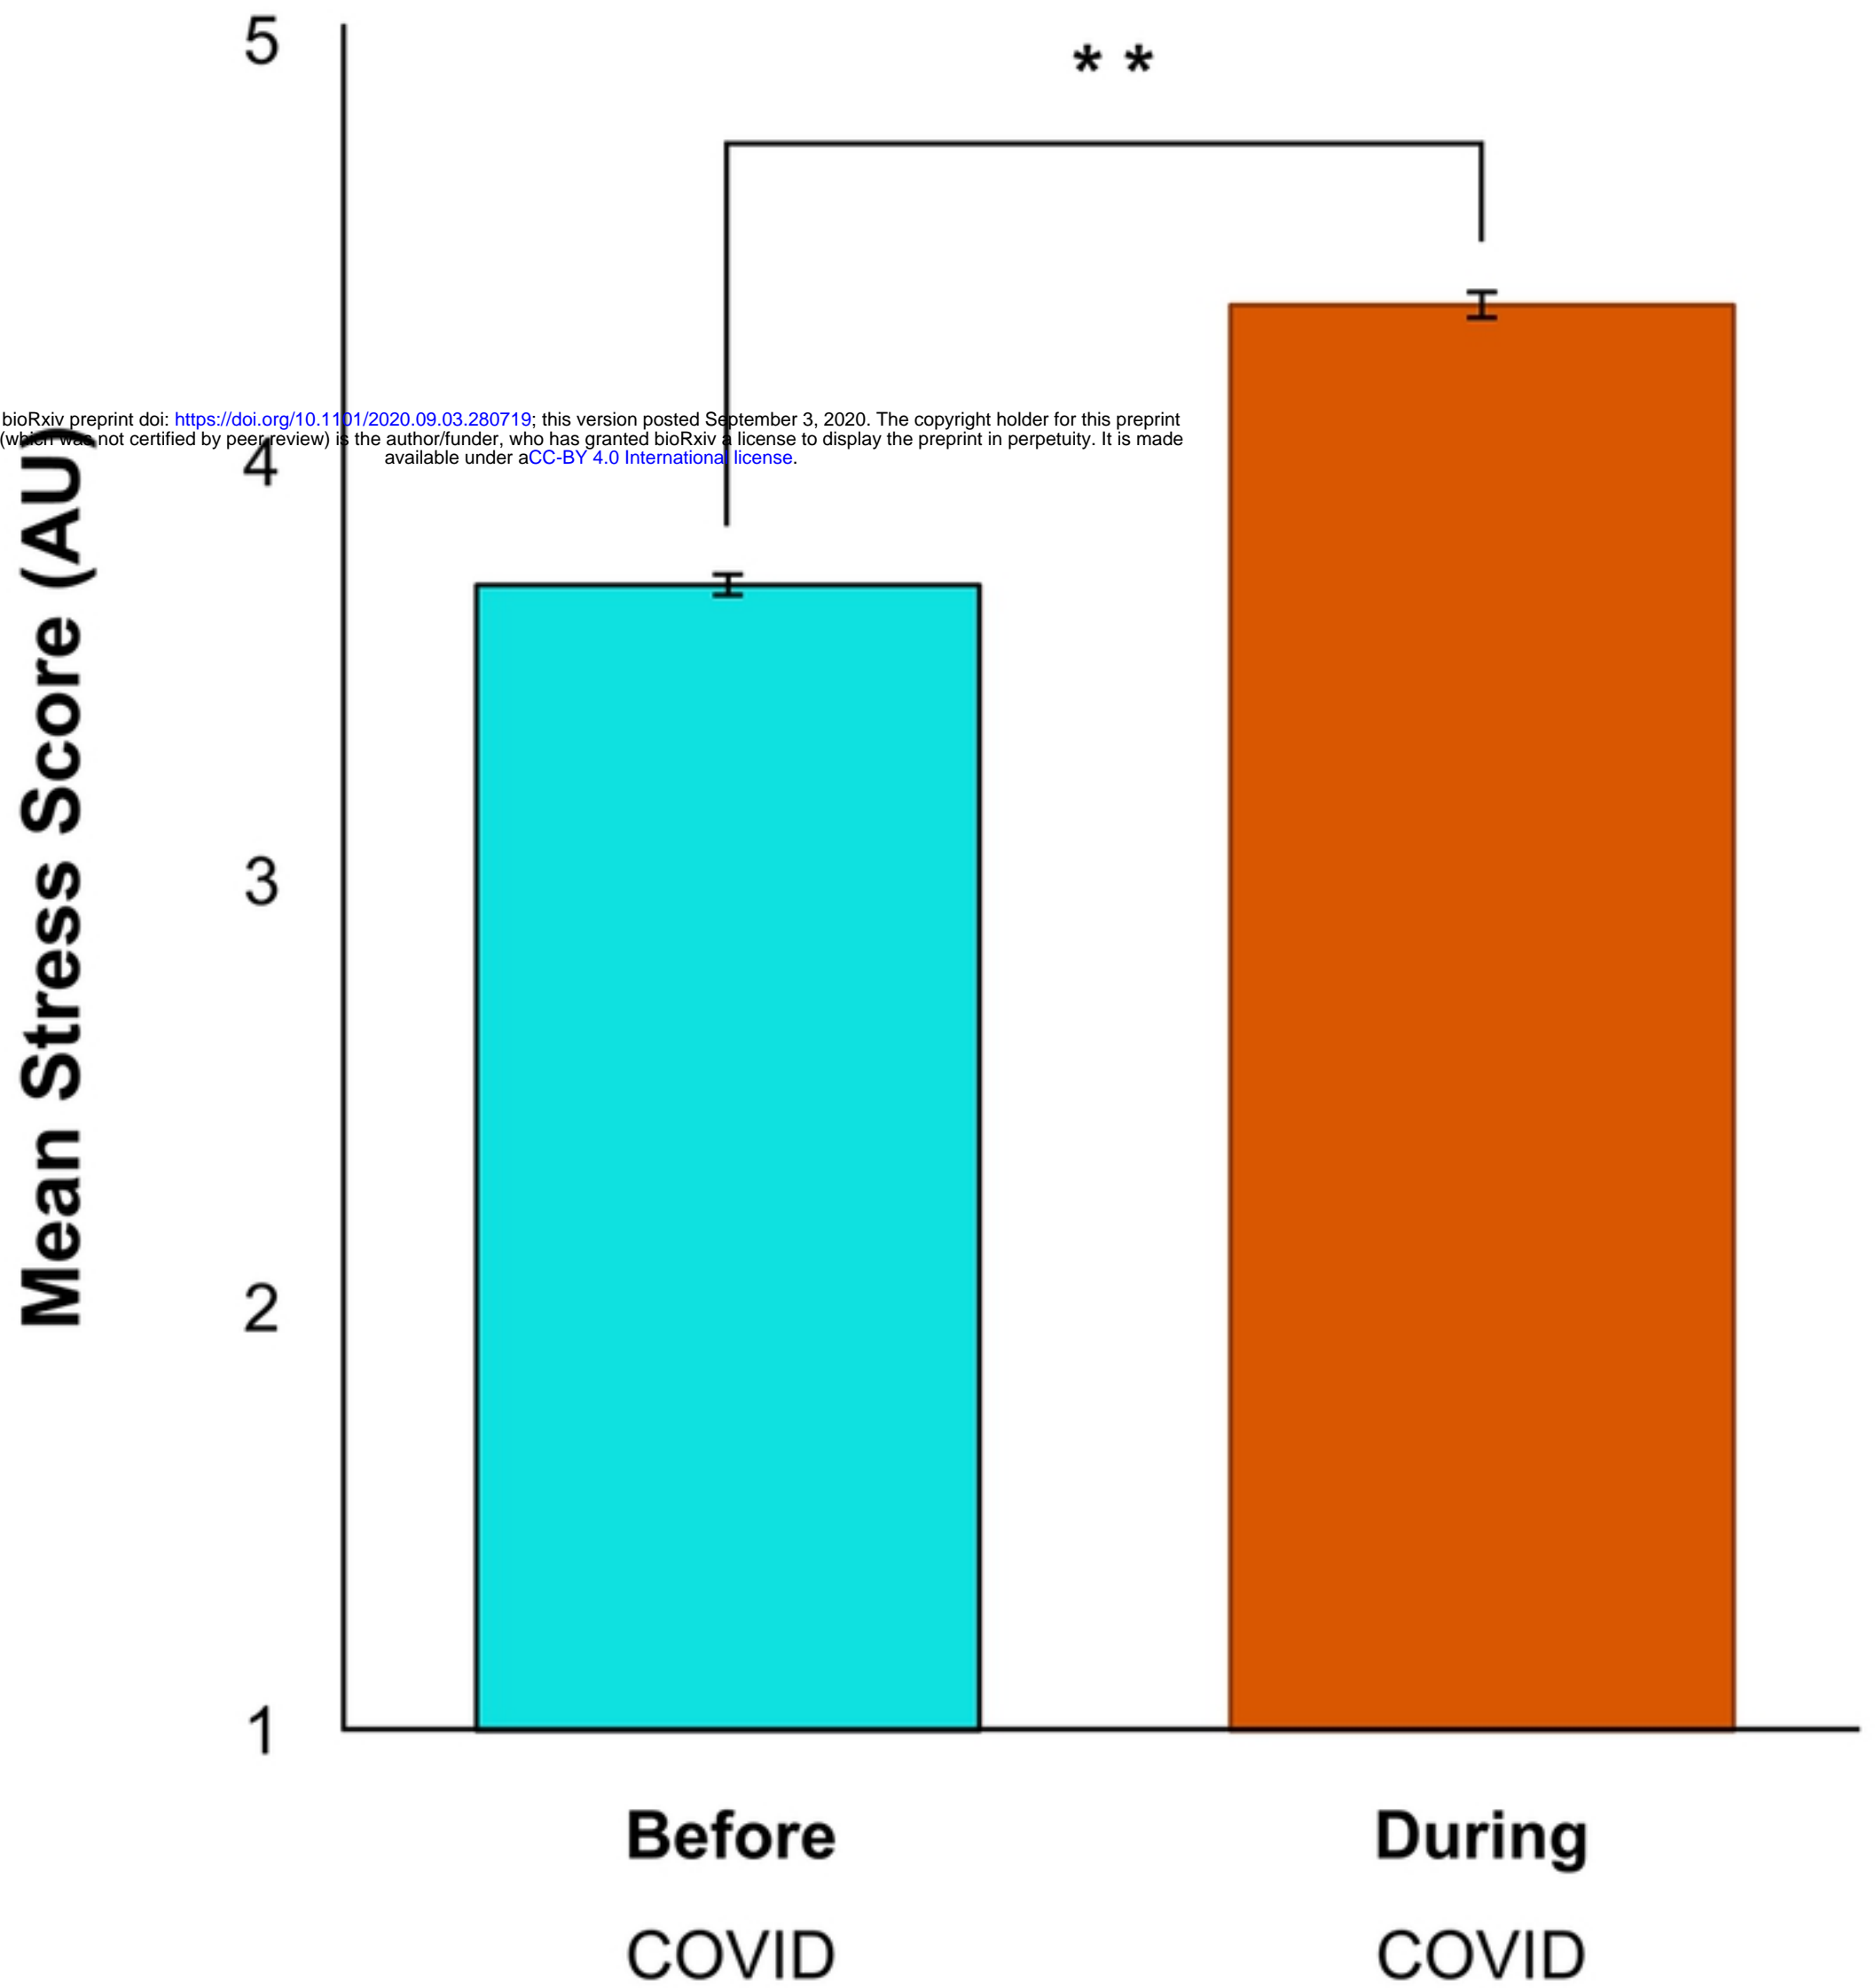

Figure 1

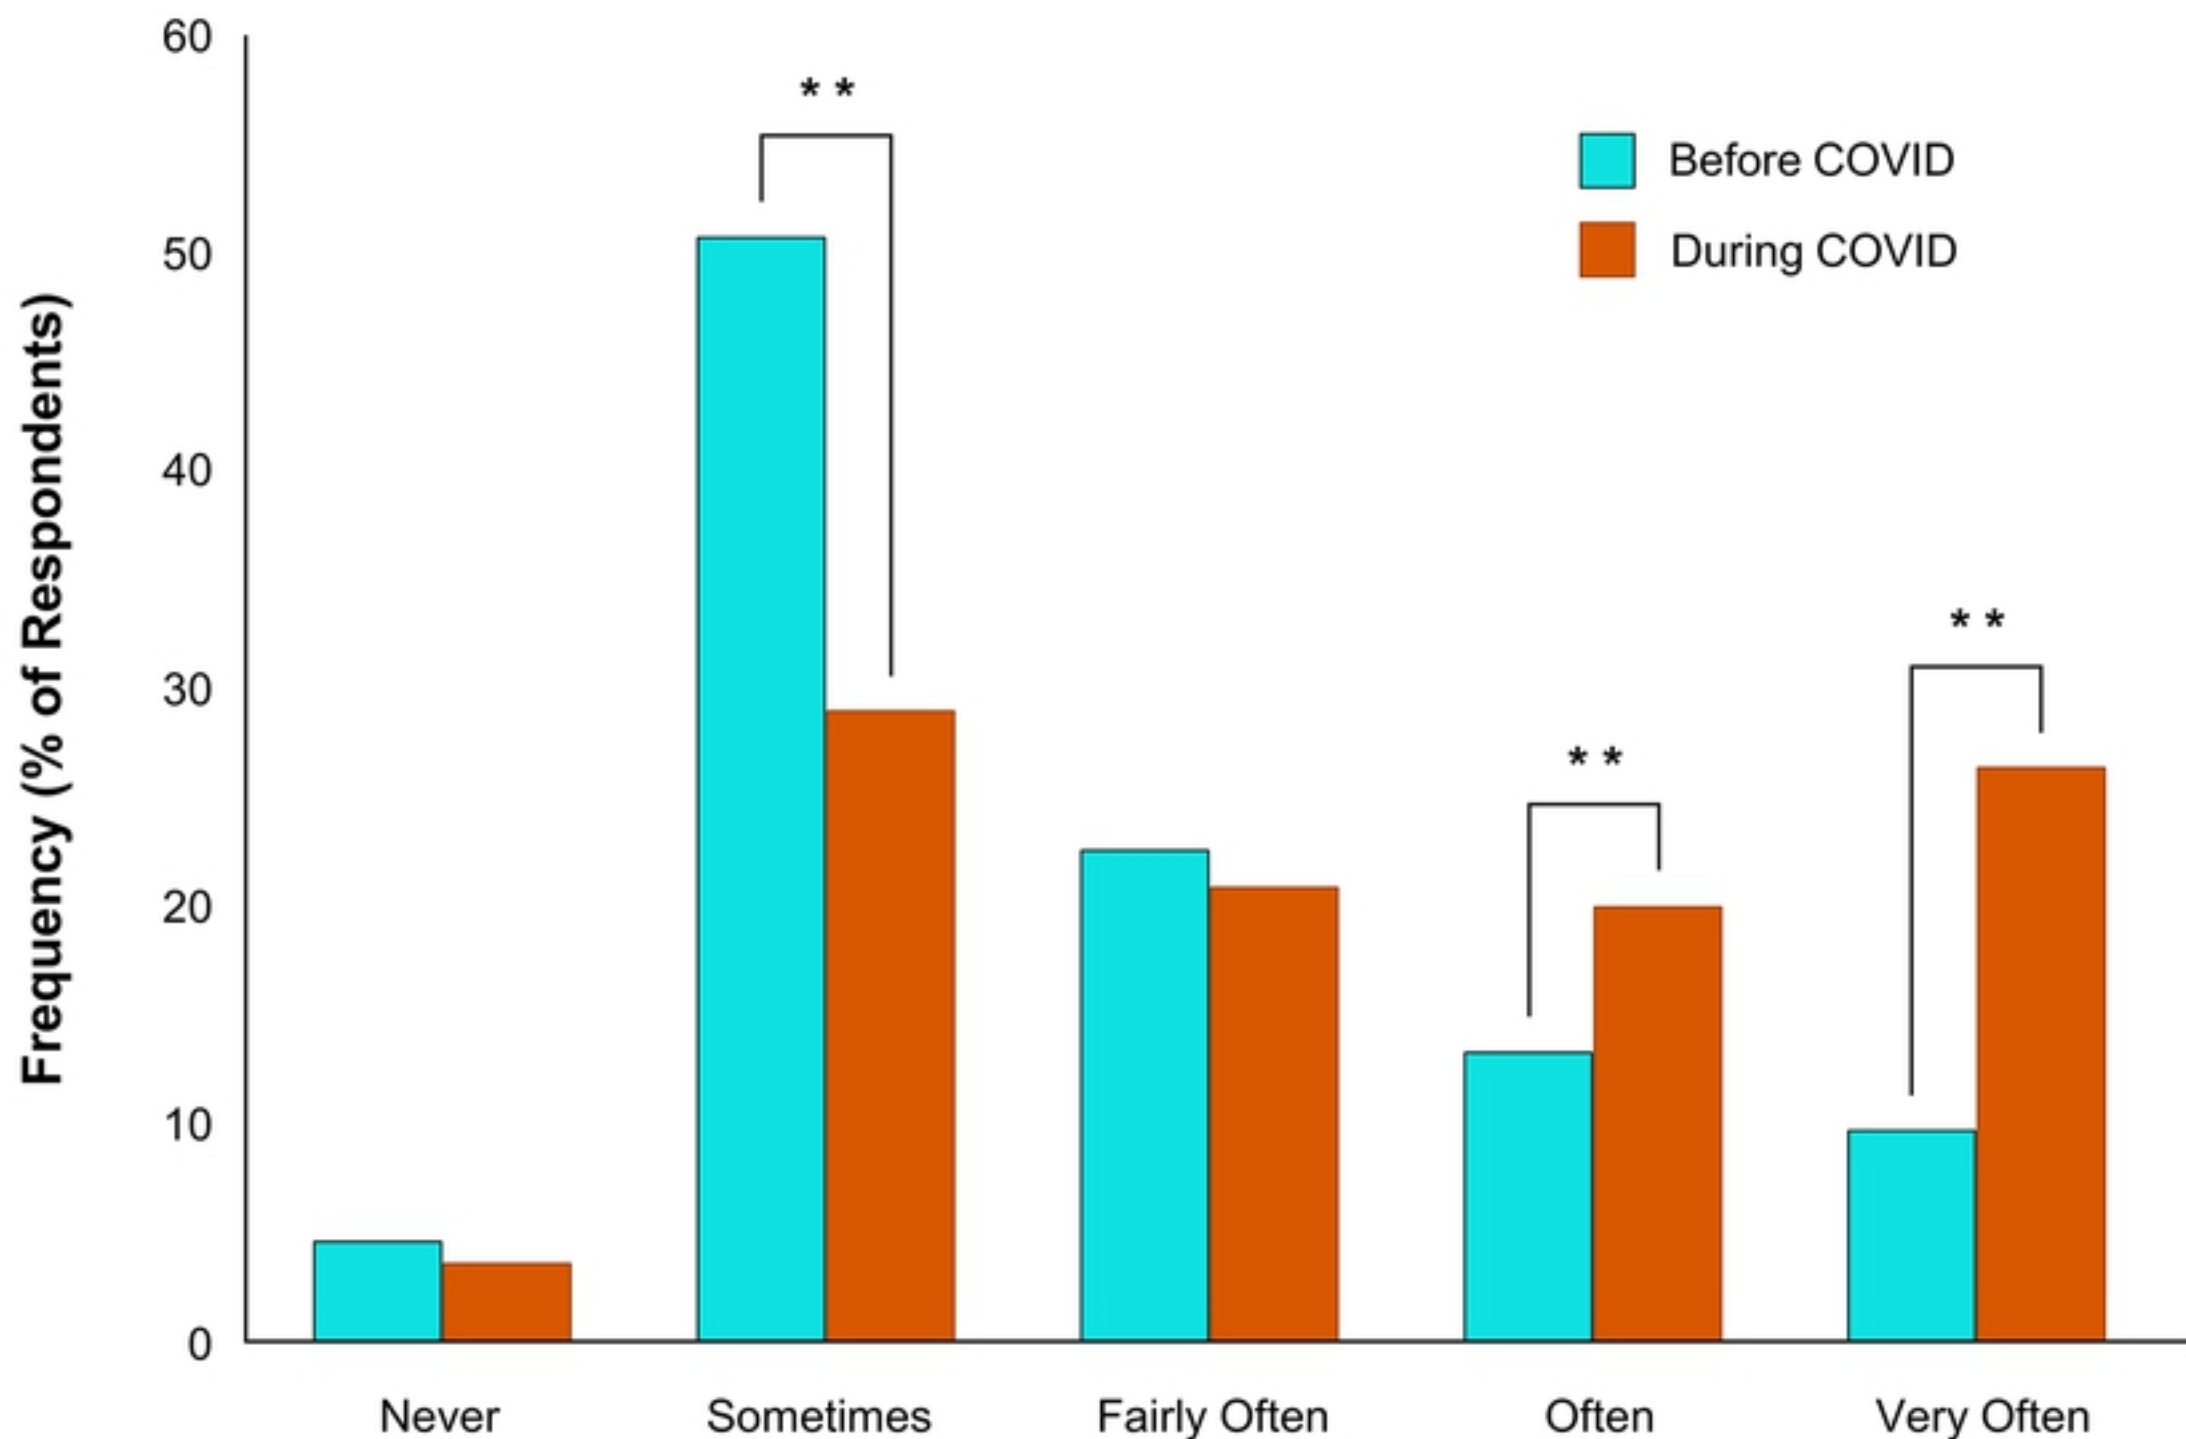

**Self-Reported Frequency of Feeling Nervous and Stress  
Before and During the COVID-19 Pandemic**

Figure 2

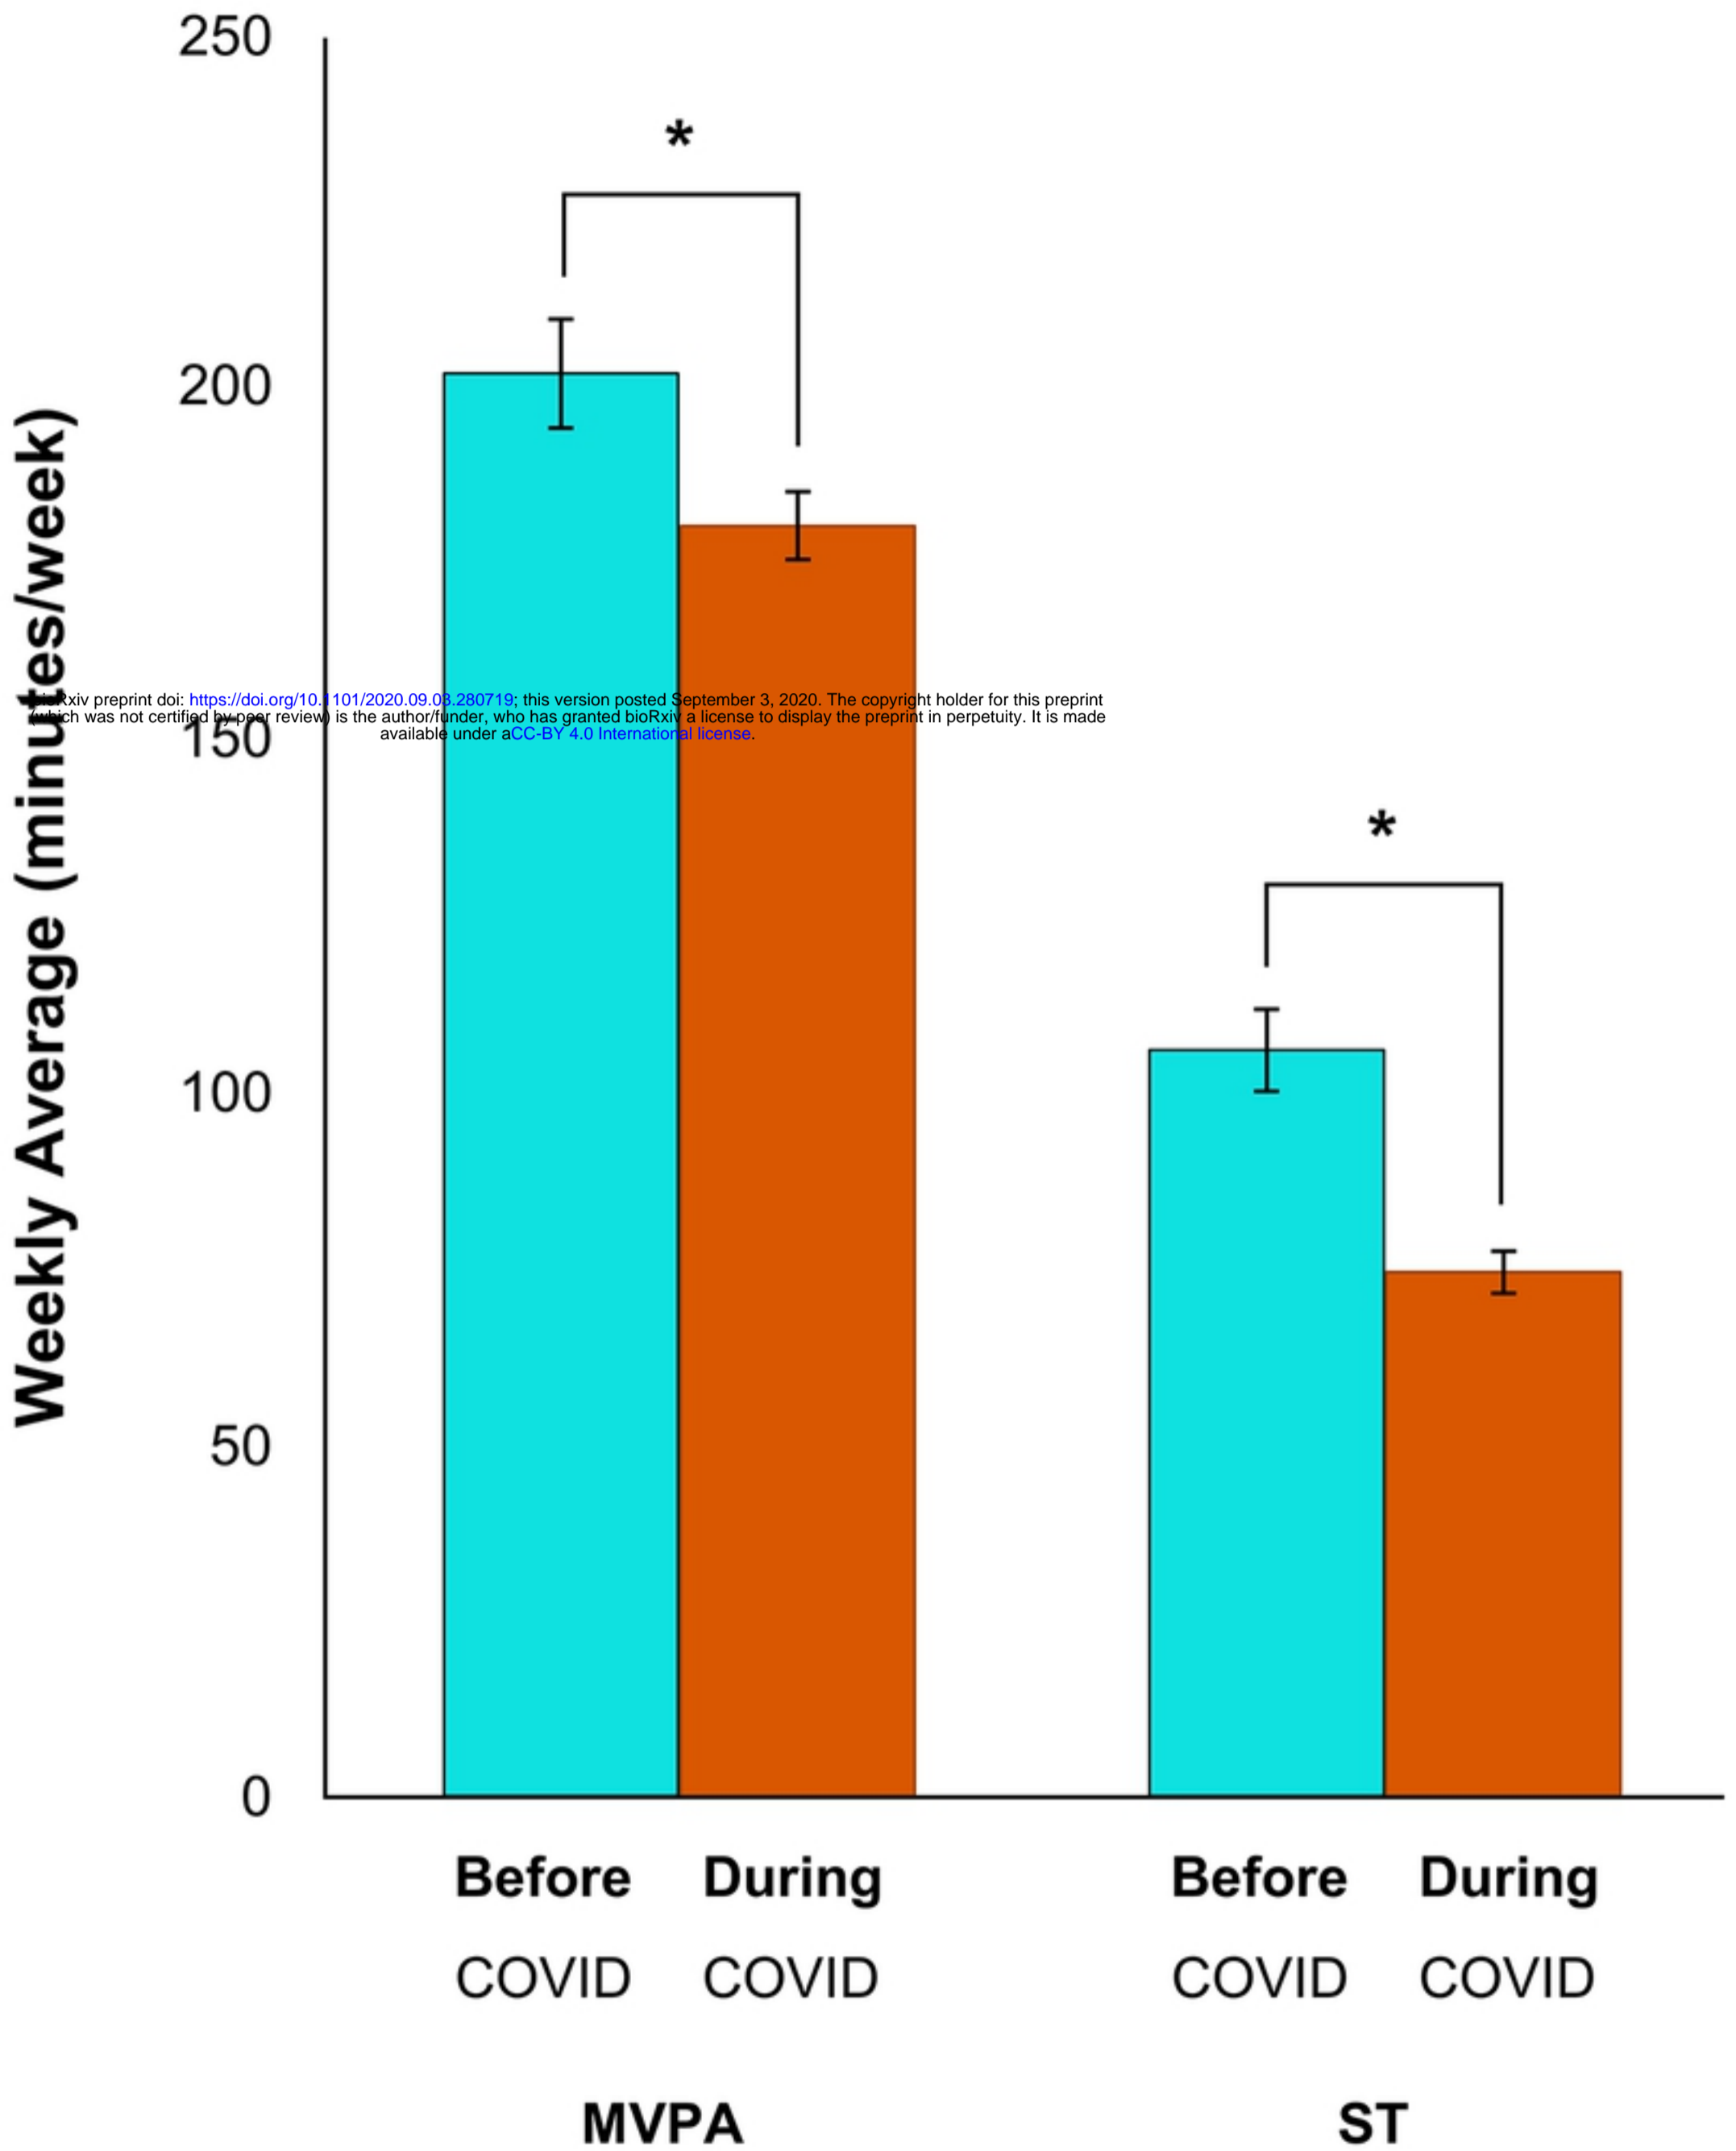

Figure 3

bioRxiv preprint doi: <https://doi.org/10.1101/2020.09.03.280719>; this version posted September 3, 2020. The copyright holder for this preprint (which was not certified by peer review) is the author/funder, who has granted bioRxiv a license to display the preprint in perpetuity. It is made available under aCC-BY 4.0 International license.

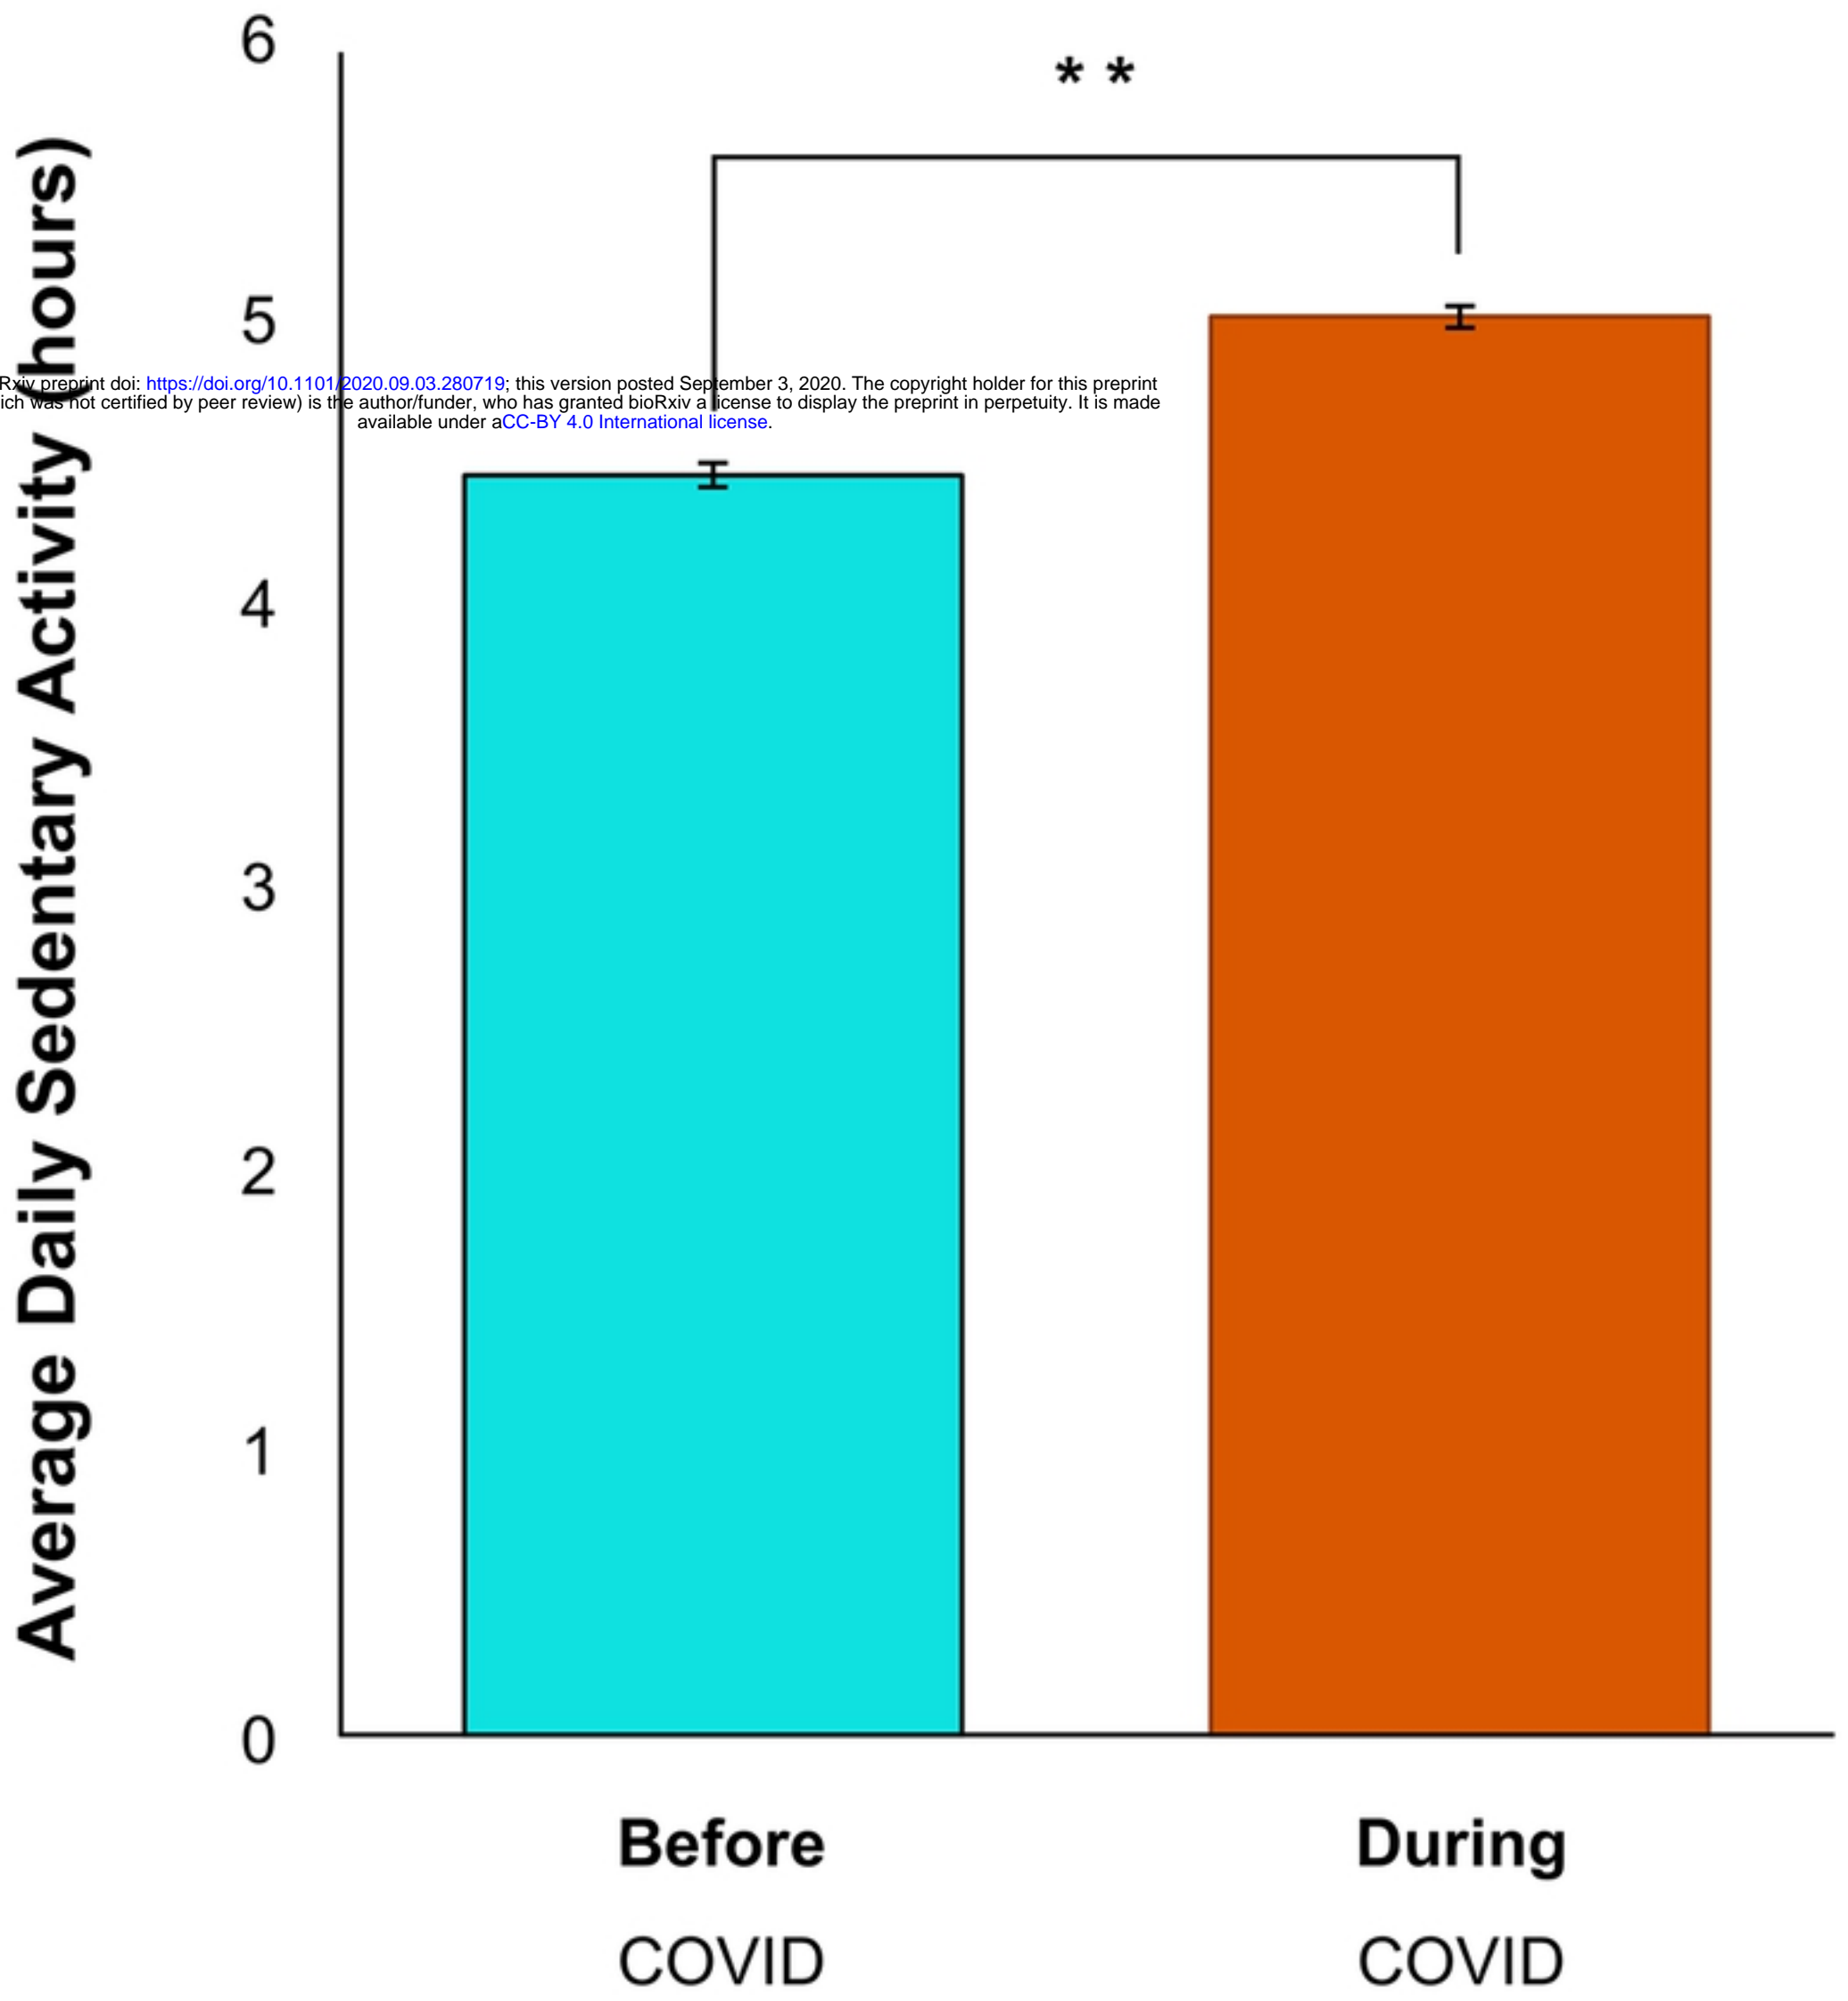

Figure 4

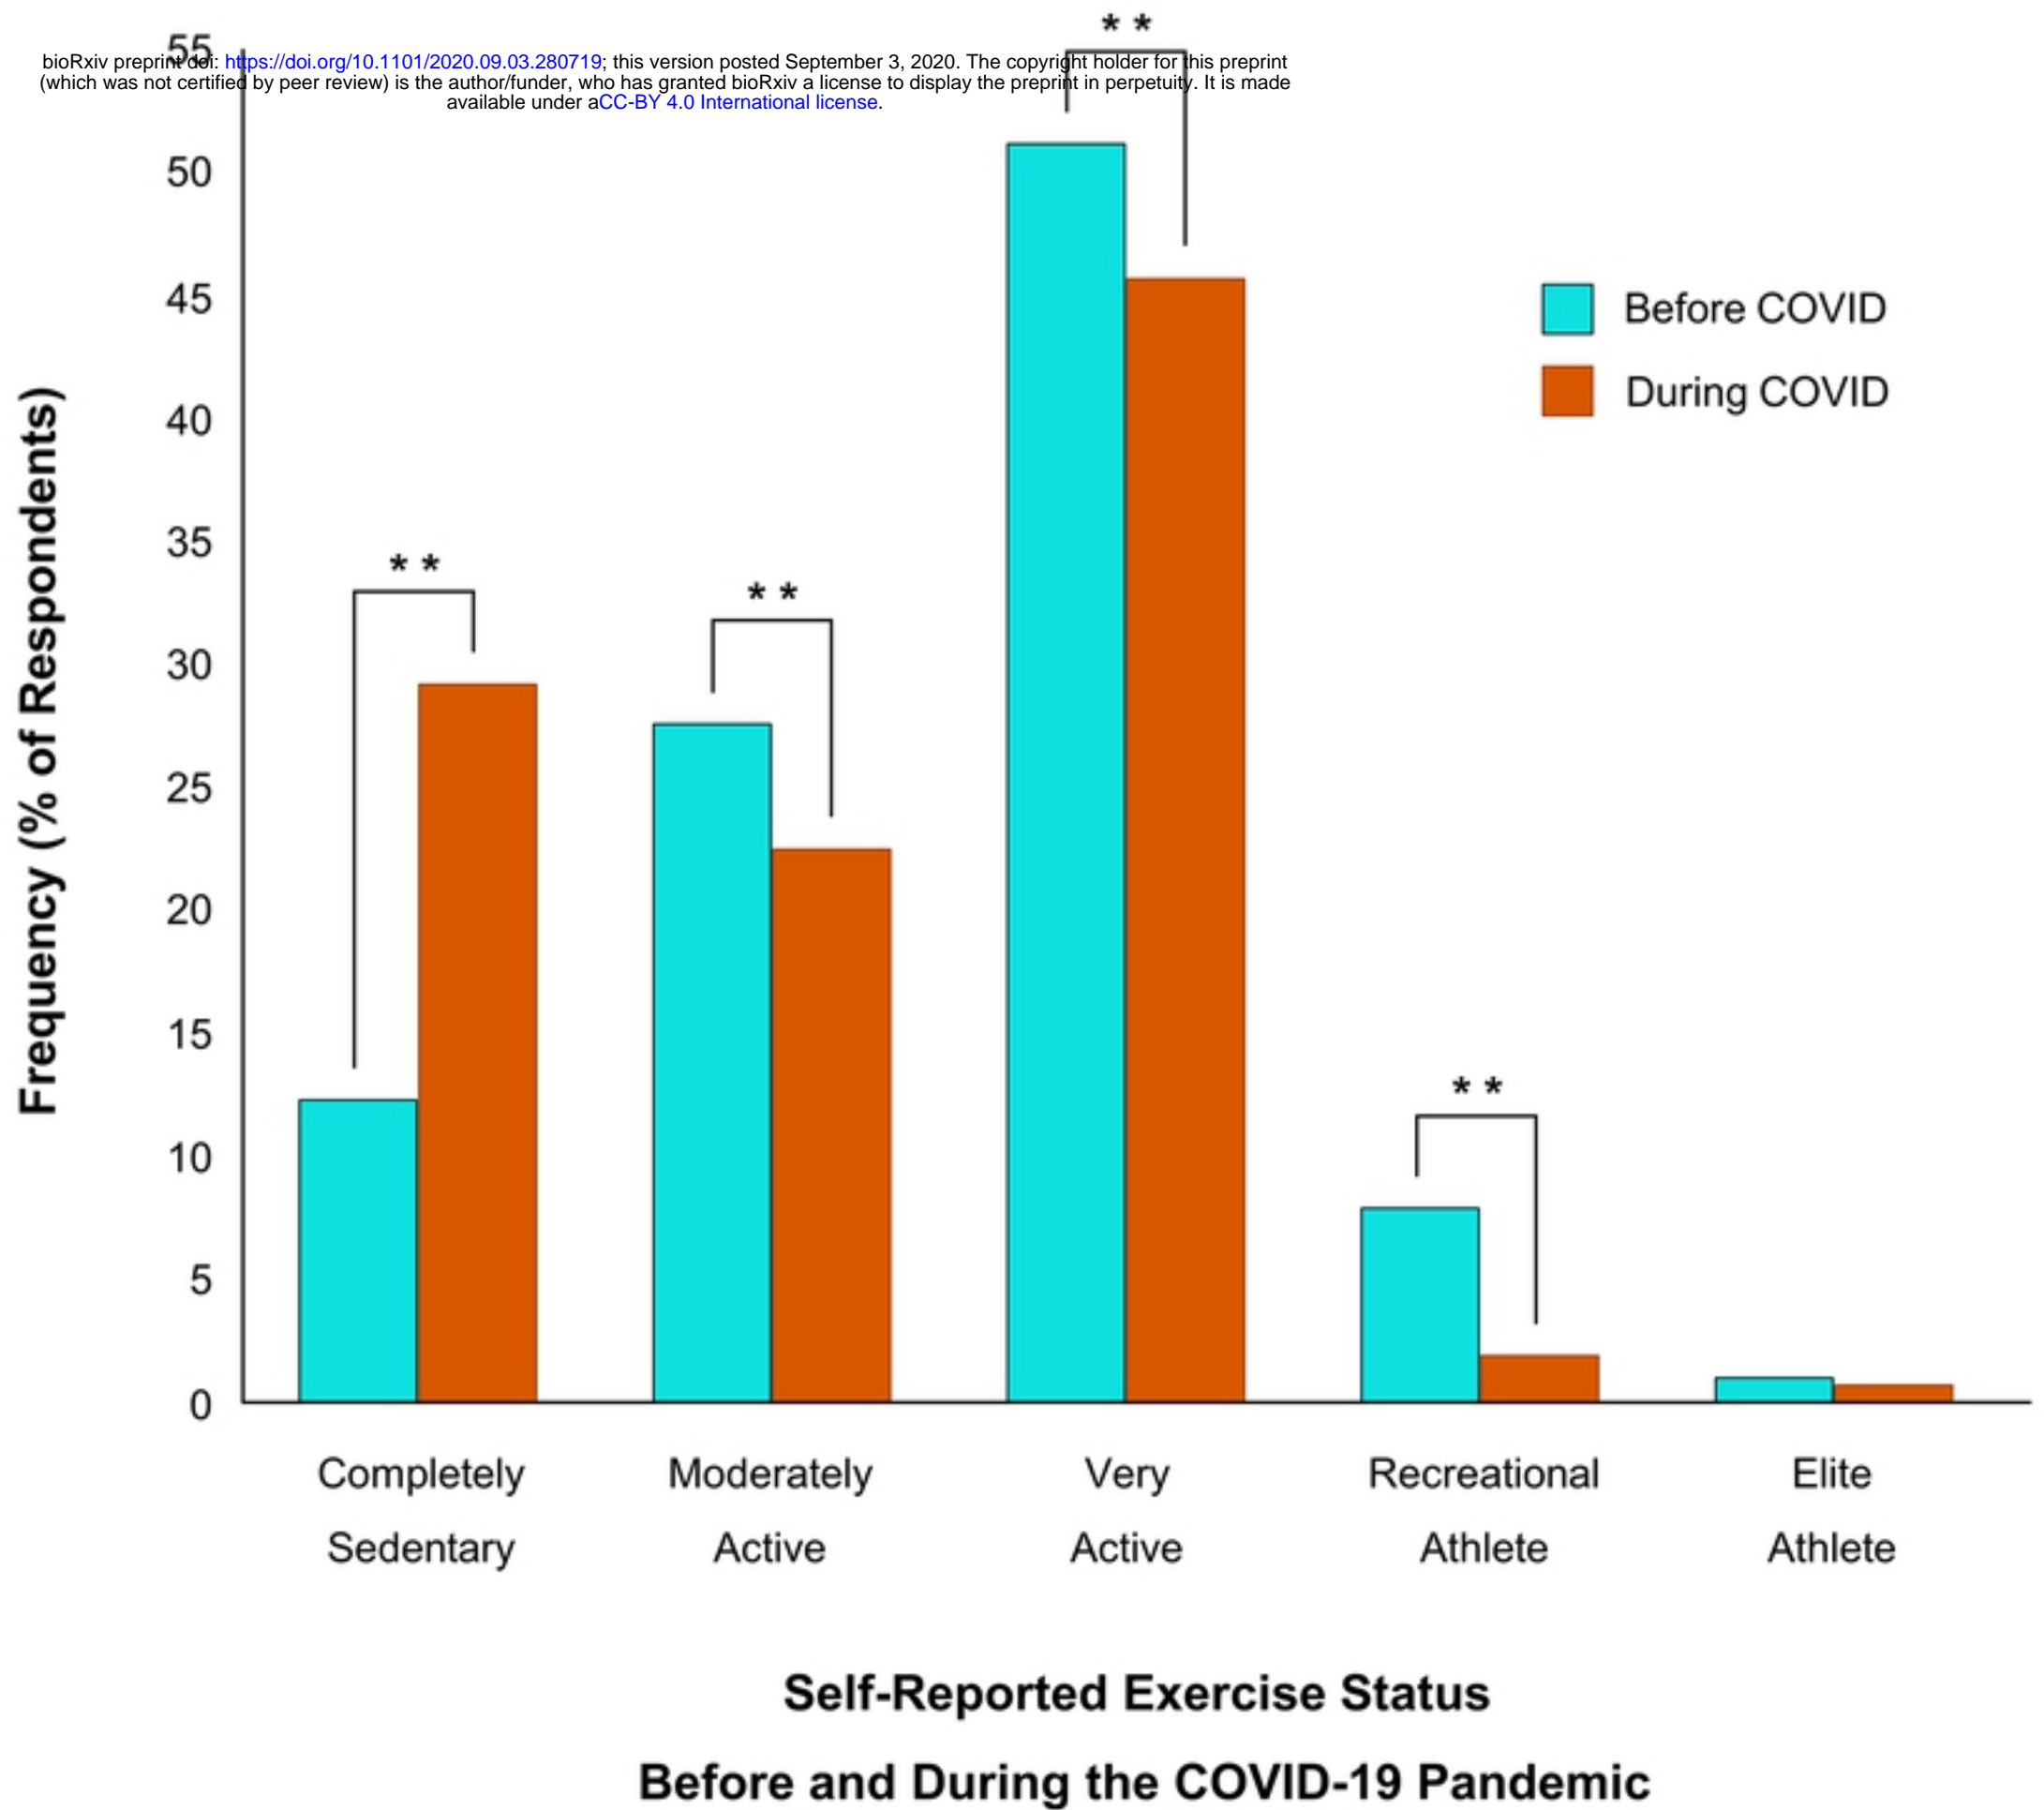

Figure 5

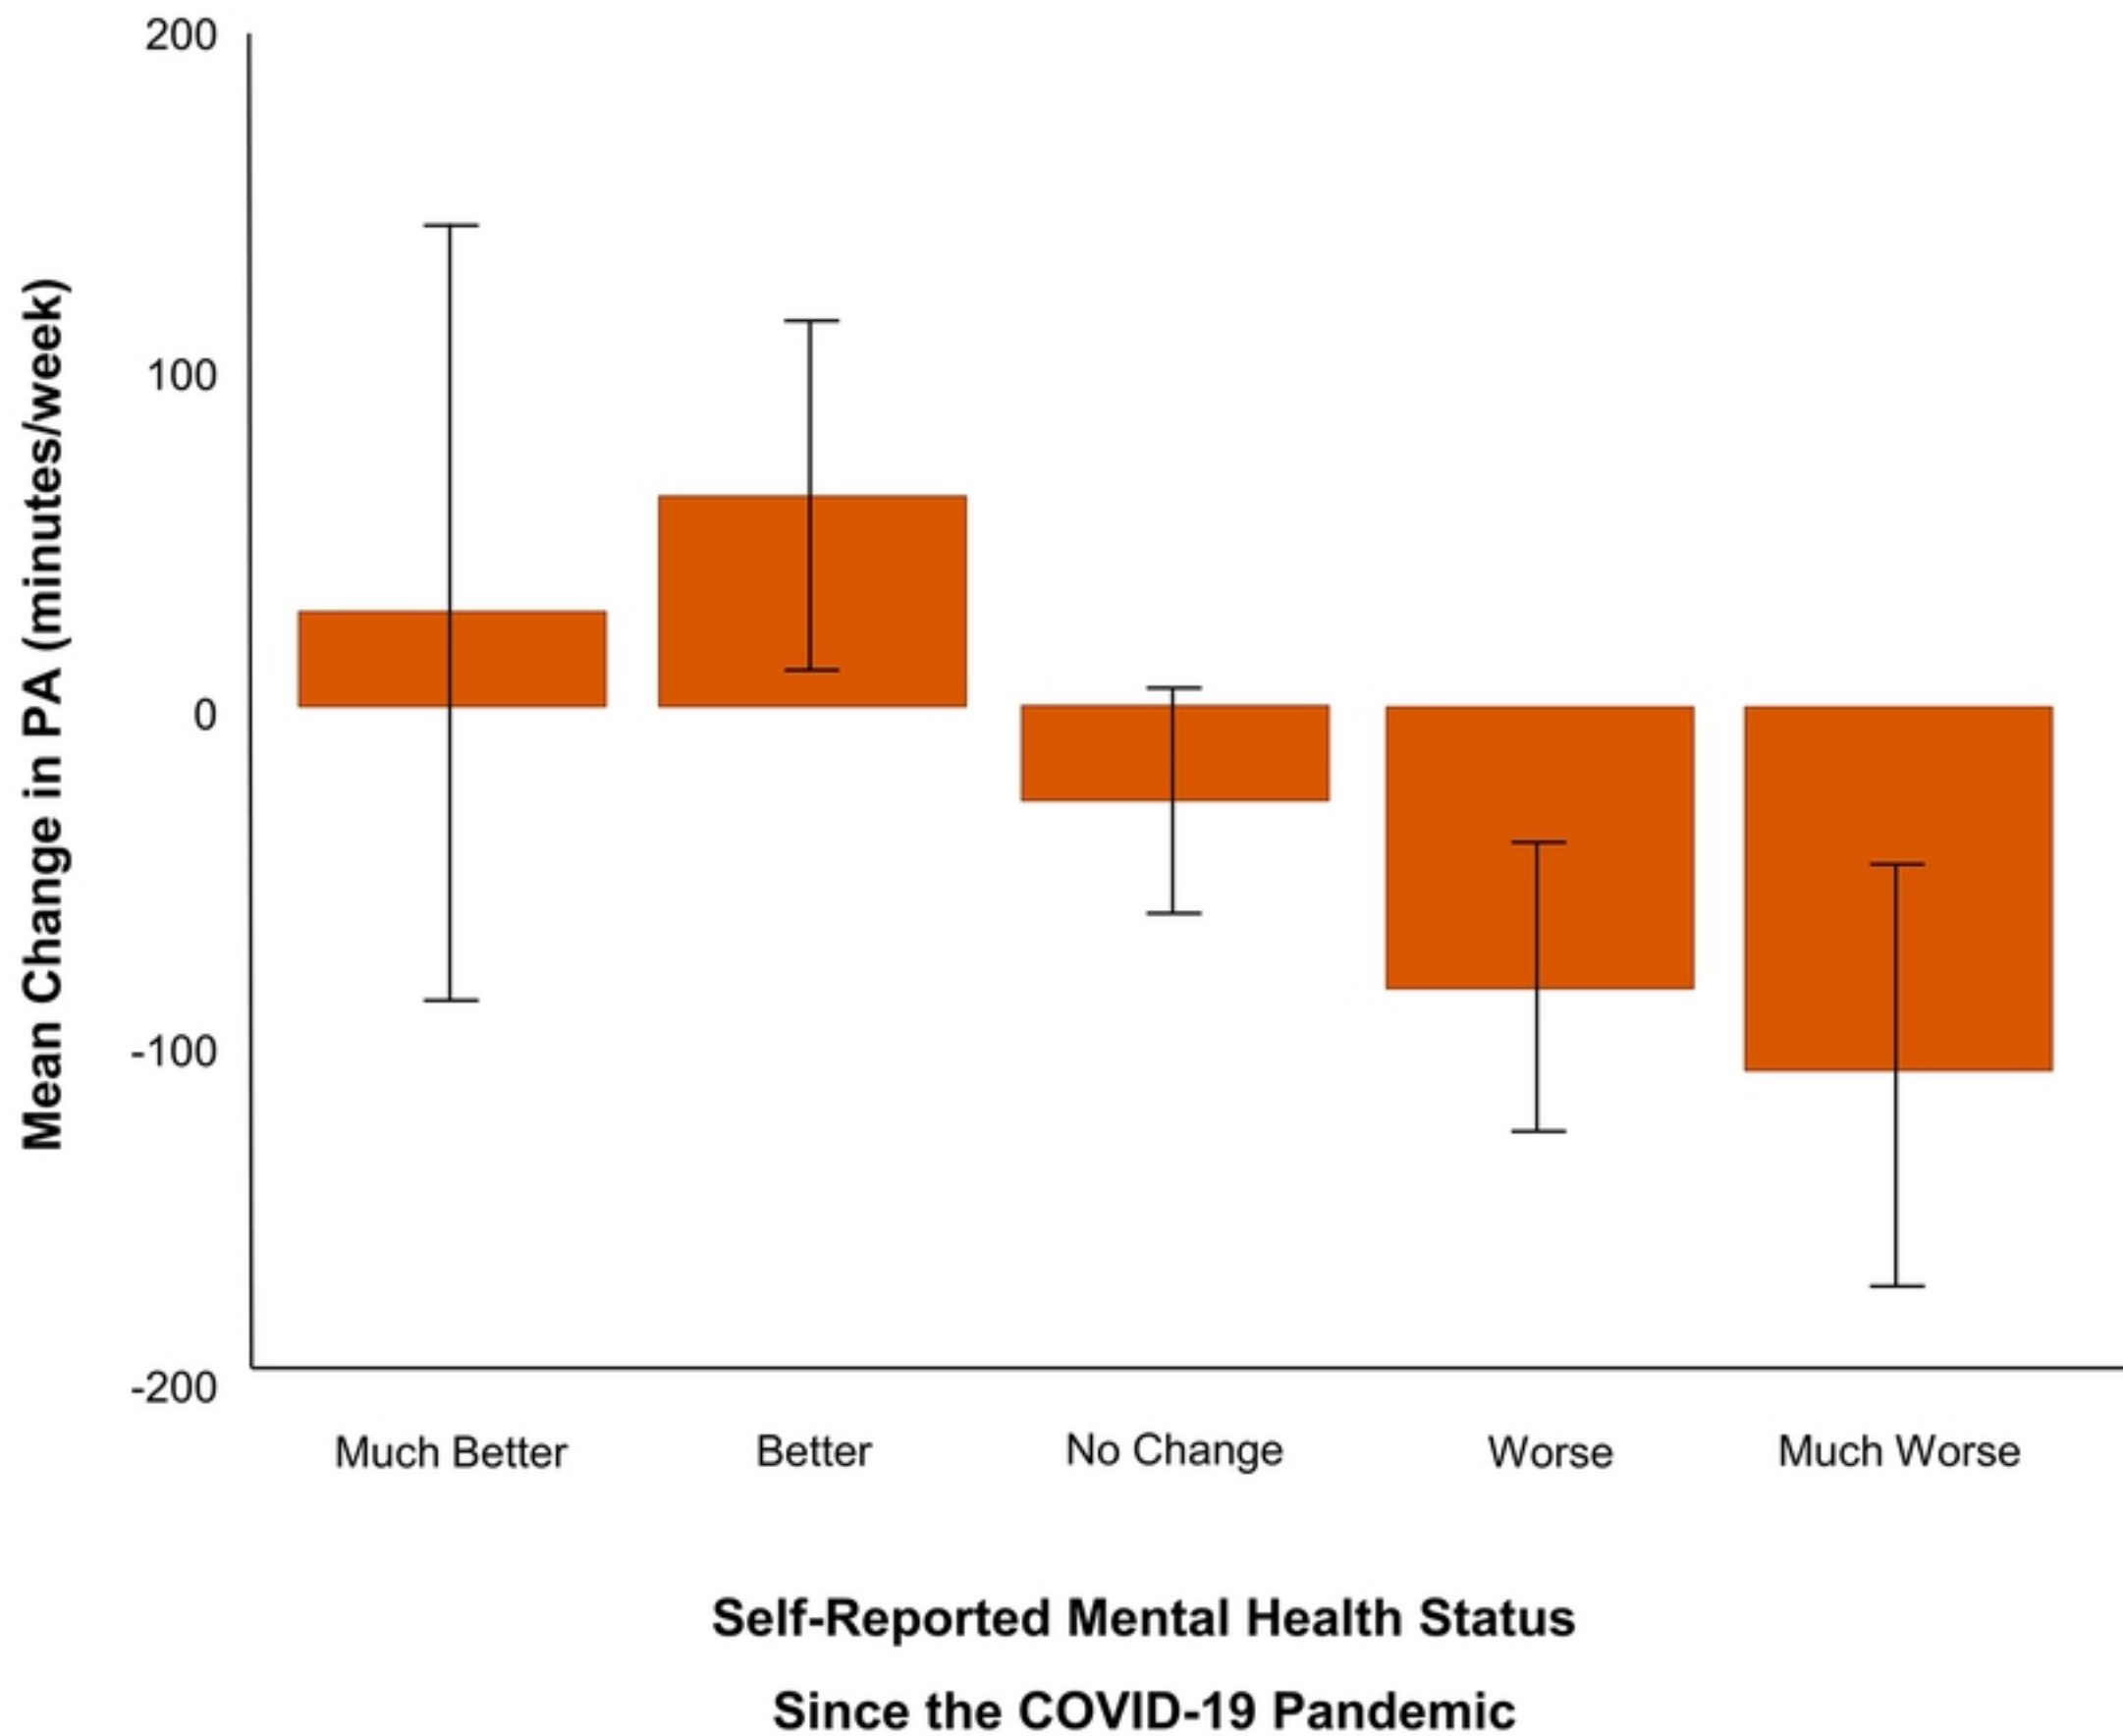

Figure 6



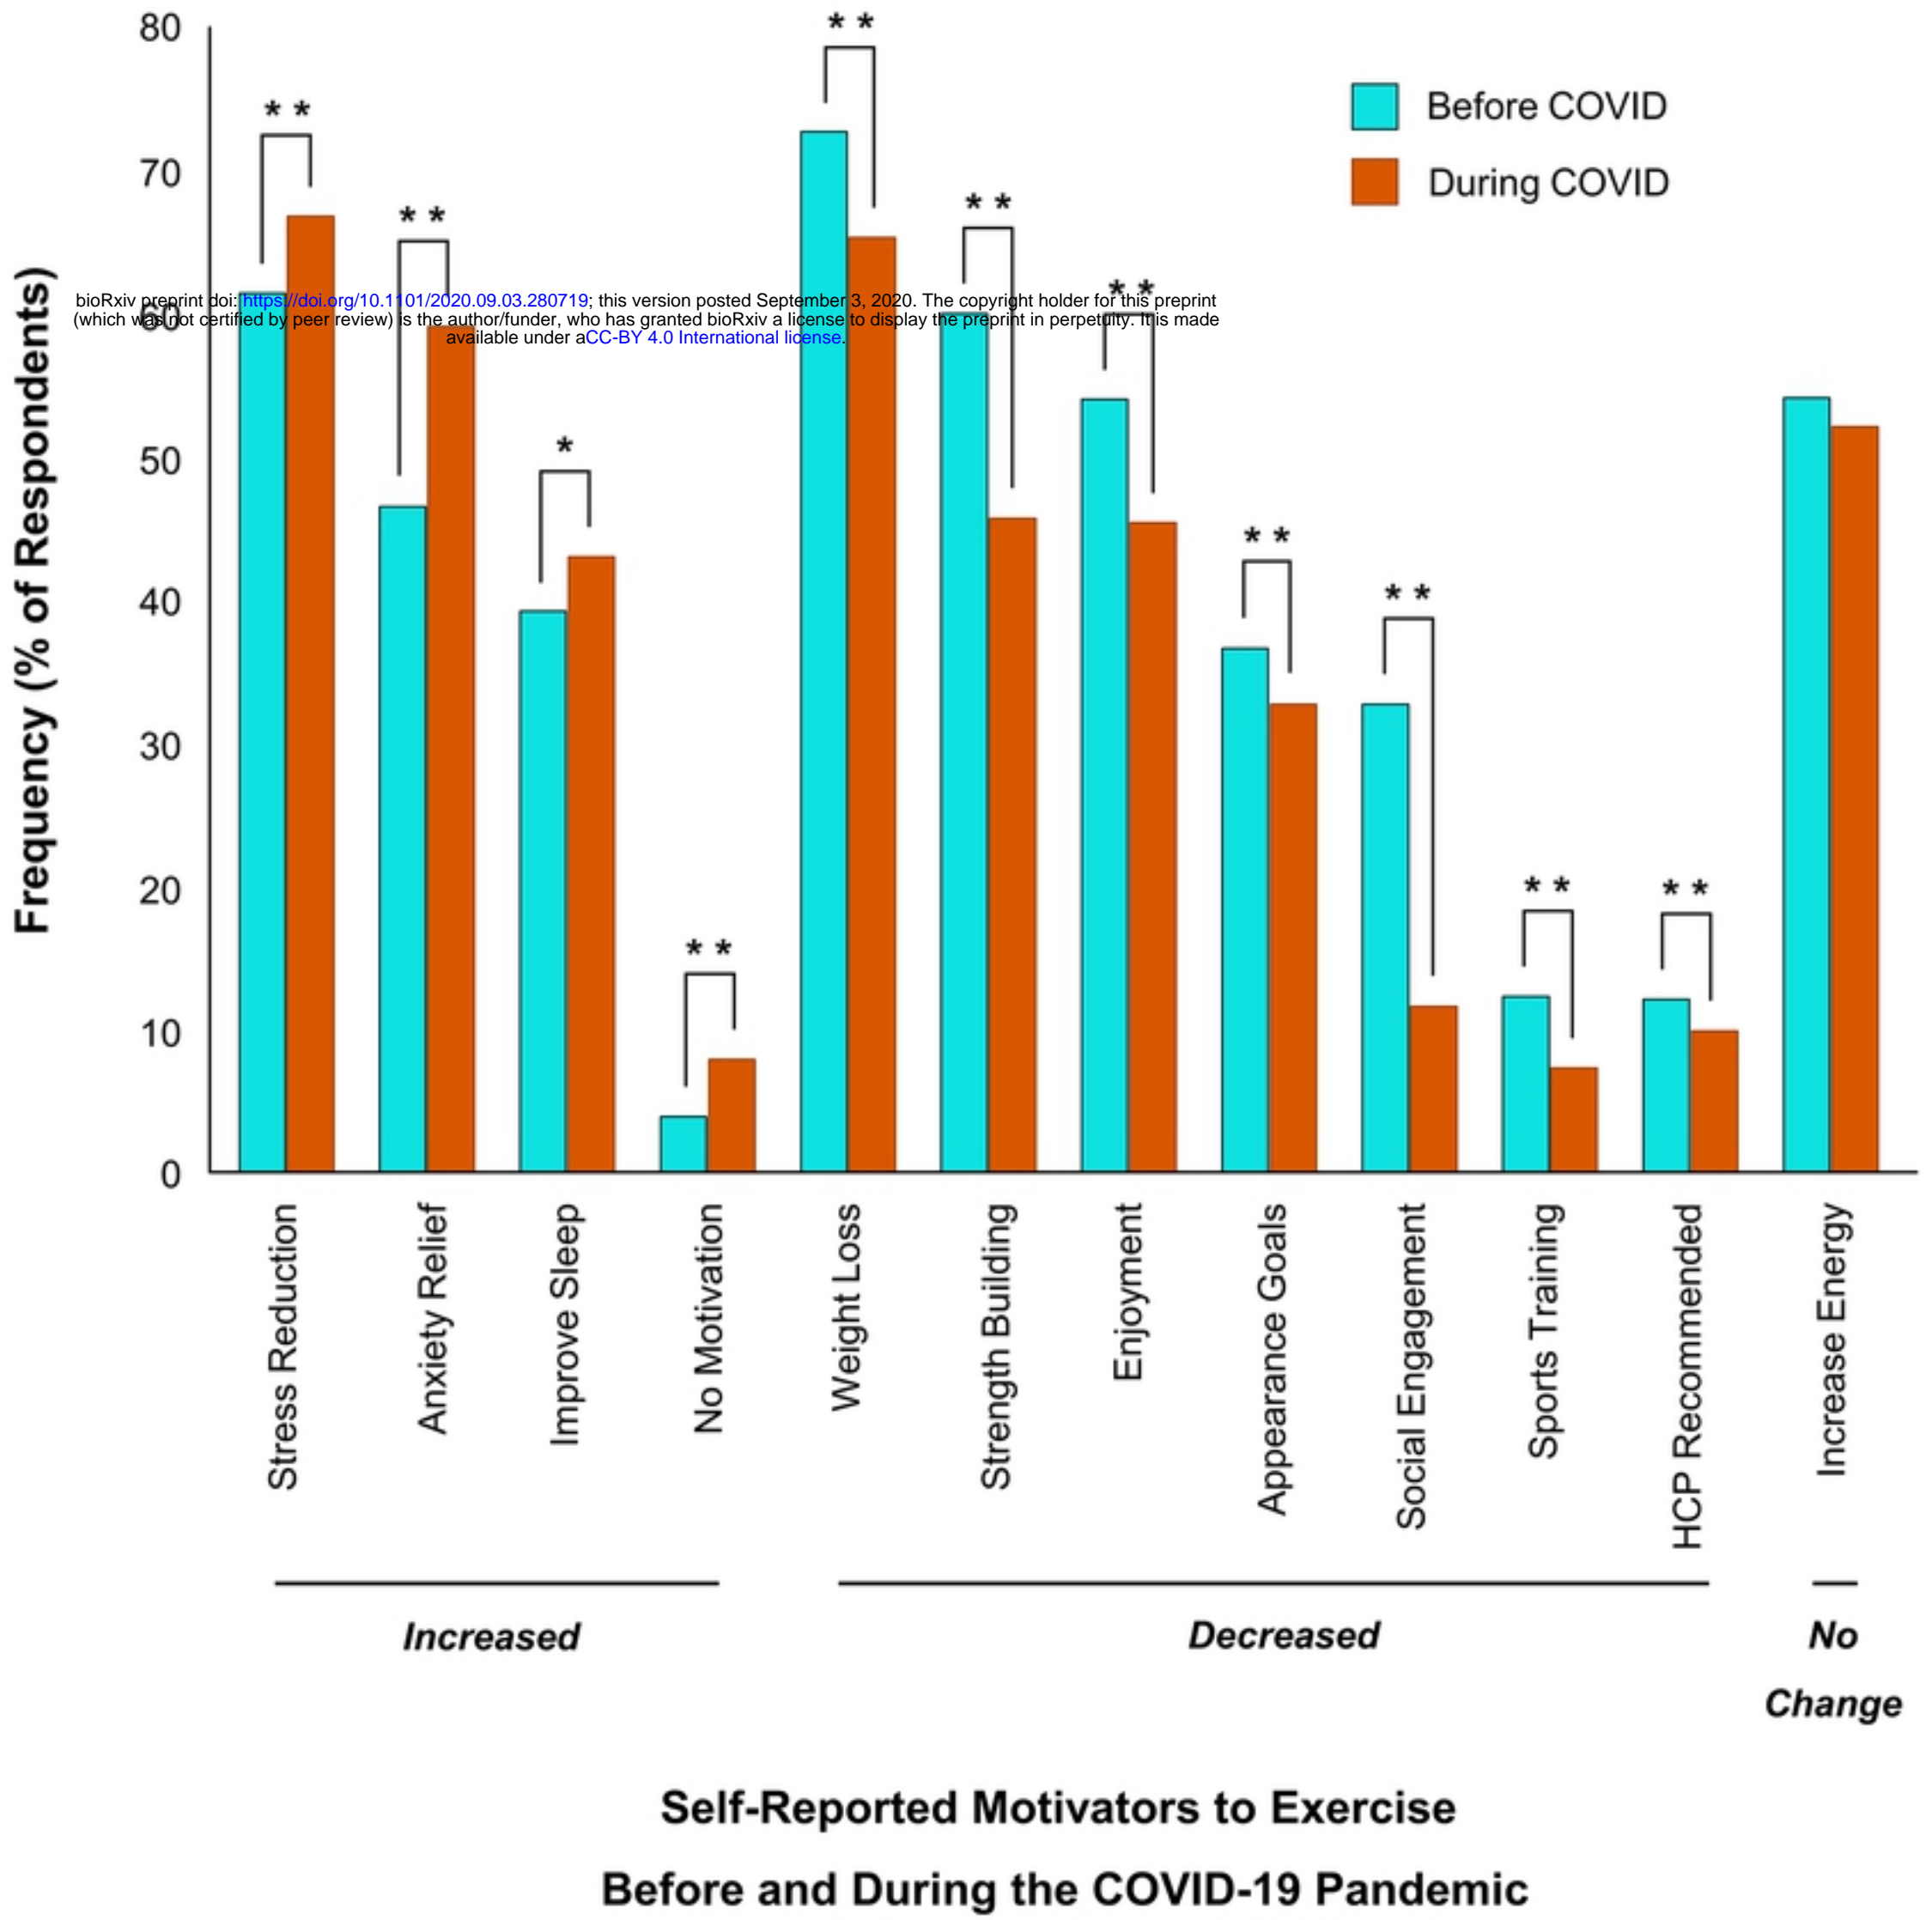

Figure 7

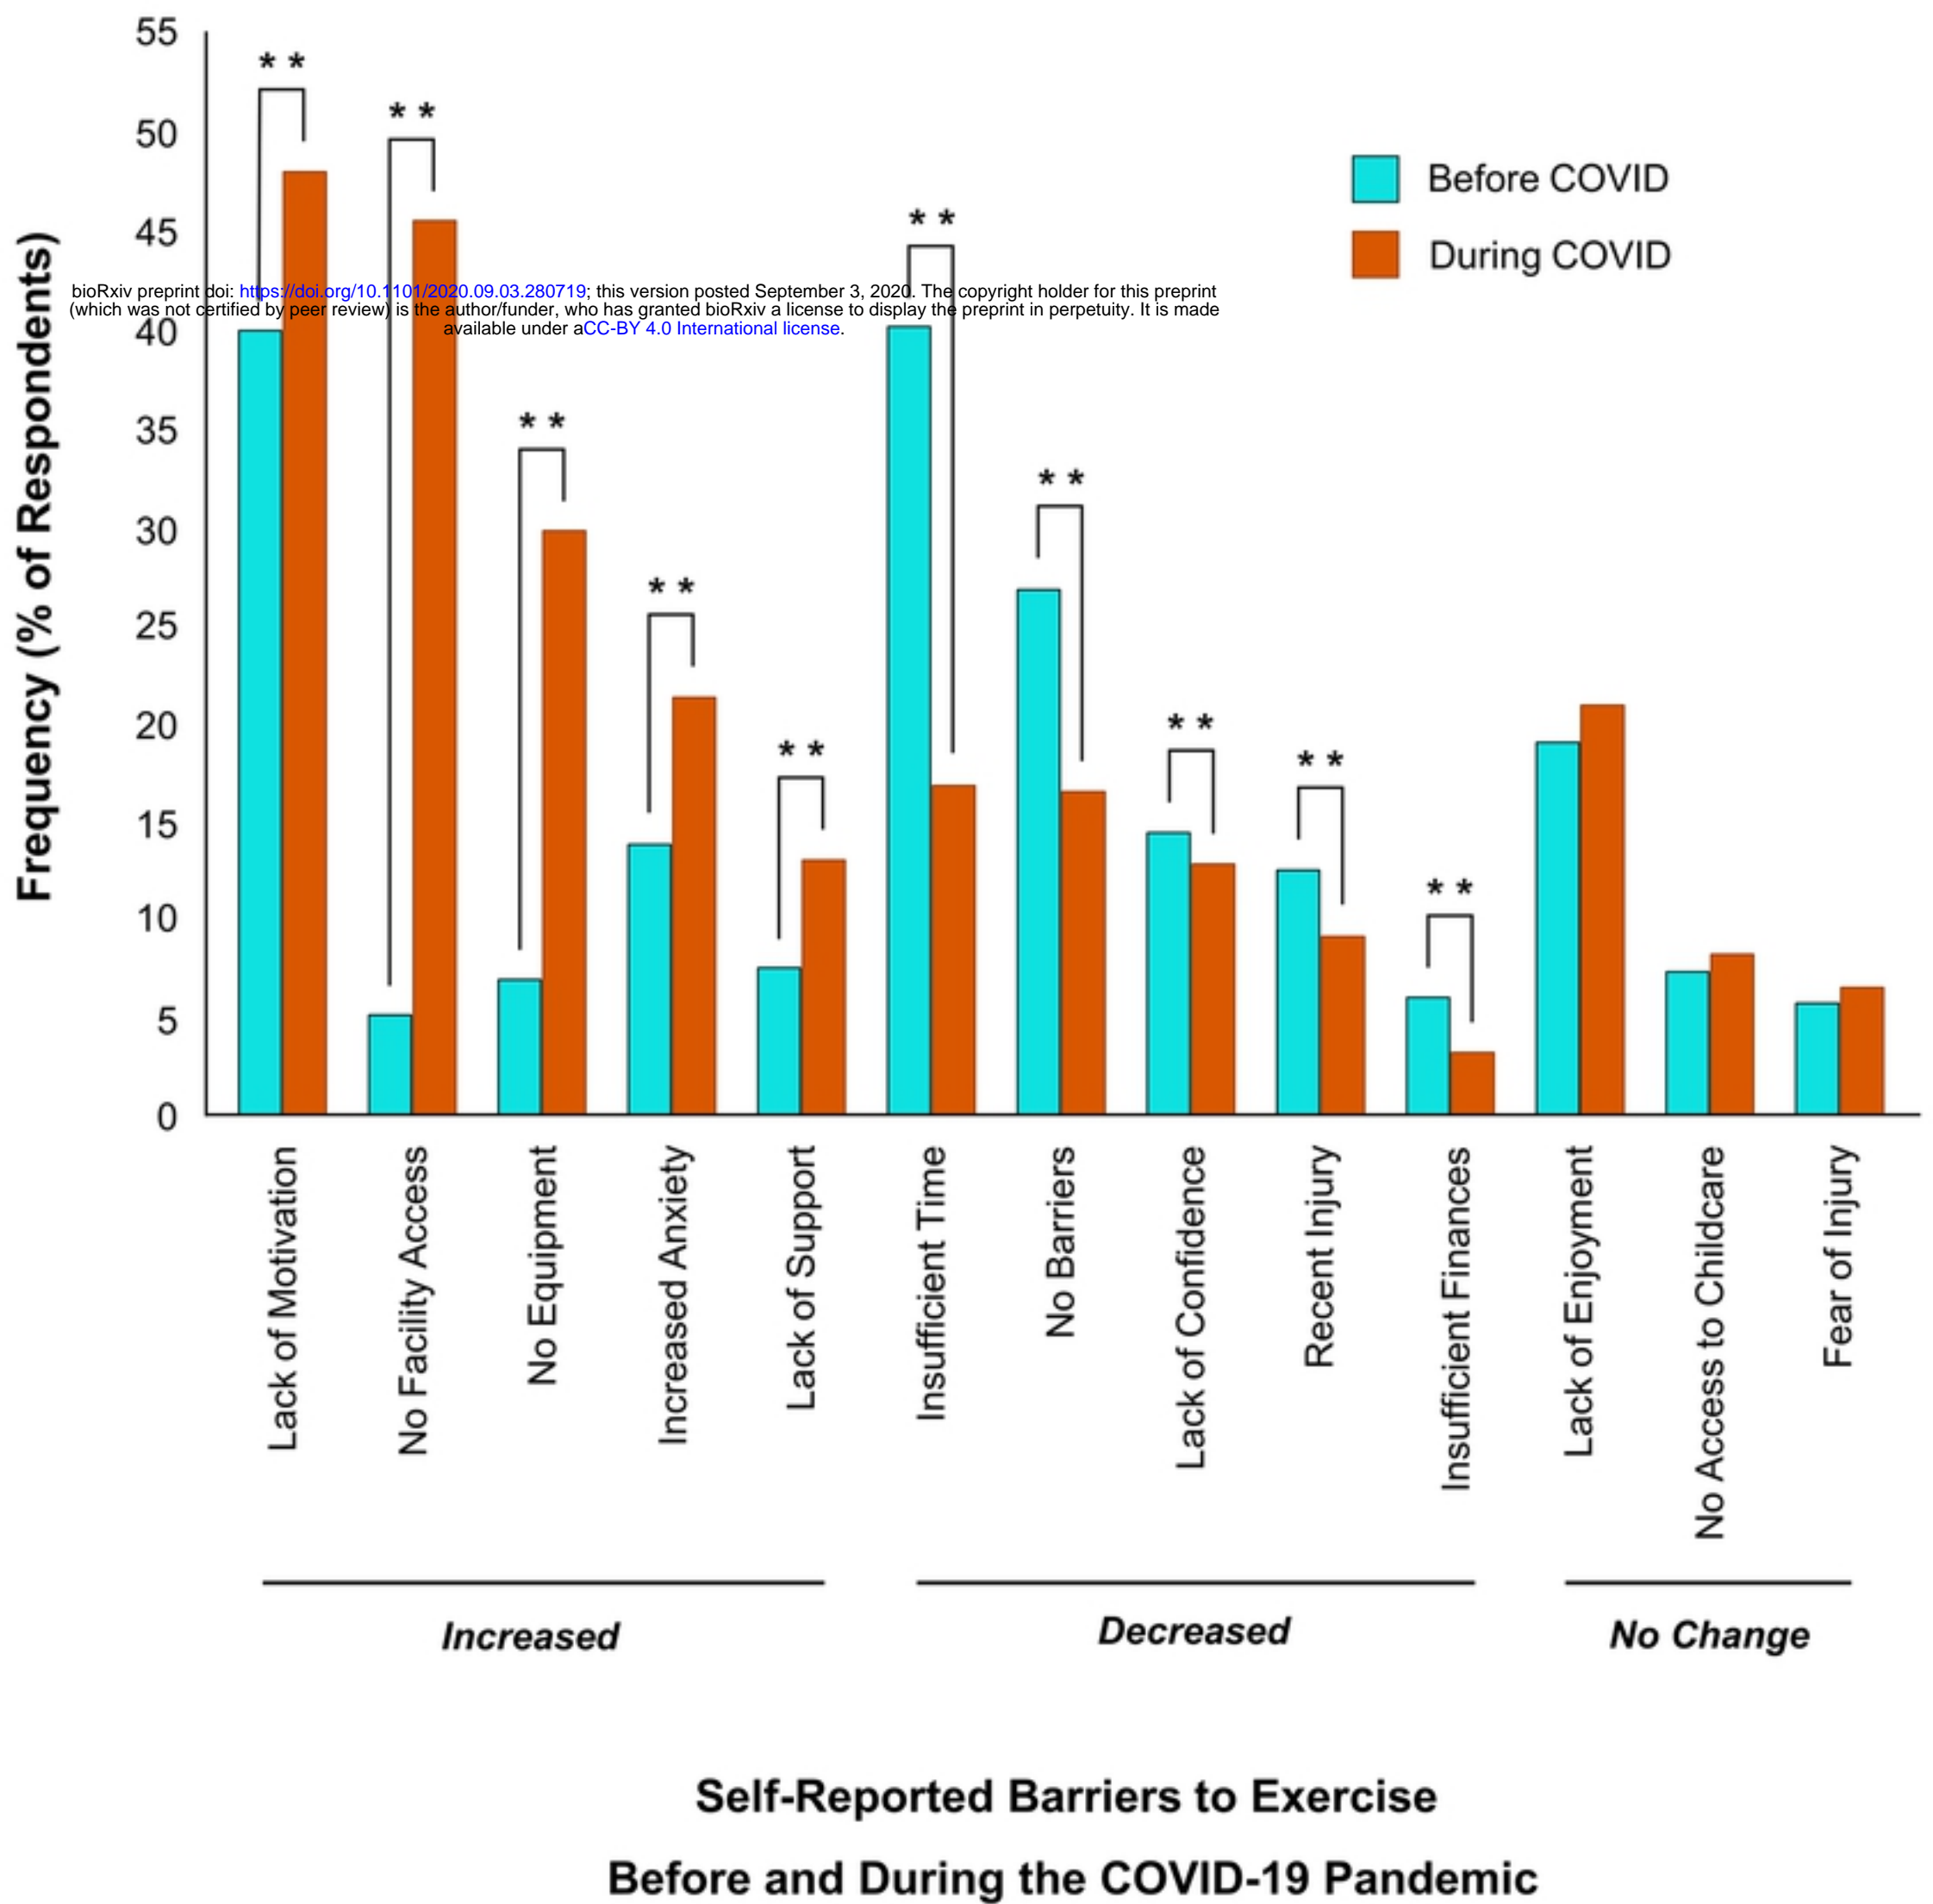

Figure 8
